# 1           **A neutrophil - B-cell axis governs disease tolerance during sepsis via Cxcr4**

## 3           **Authors:**

4           Riem Gawish<sup>1,2</sup>, Barbara B. Maier<sup>1,2</sup>, Georg Obermayer<sup>2,3</sup>, Martin L. Watznböck<sup>1,2</sup>, Anna-  
5           Dorothea Gorki<sup>1,2</sup>, Federica Quattrone<sup>1,2</sup>, Asma Farhat<sup>1,2</sup>, Karin Lakovits<sup>1</sup>, Anastasiya Hladik<sup>1</sup>, Ana  
6           Korosec<sup>1</sup>, Arman Alimohammadi<sup>4</sup>, Ildiko Mesteri<sup>5,†</sup>, Felicitas Oberndorfer<sup>5</sup>, Fiona Oakley<sup>6</sup>, John  
7           Brain<sup>6</sup>, Louis Boon<sup>7</sup>, Irene Lang<sup>4</sup>, Christoph J. Binder<sup>2,3</sup> and Sylvia Knapp<sup>1,2,\*</sup>

9           <sup>1</sup> Department of Medicine I, Laboratory of Infection Biology, Medical University Vienna, Austria, <sup>2</sup>  
10          Ce-M-M-, Research Center for Molecular Medicine of the Austrian Academy of Sciences, Vienna,  
11          Austria, <sup>3</sup> Department of Laboratory Medicine, Medical University of Vienna, Austria, <sup>4</sup> Department  
12          of Medicine II, Division of Cardiology, Medical University of Vienna, Austria, <sup>5</sup> Department of  
13          Pathology, Medical University Vienna, Austria, <sup>6</sup> Newcastle Fibrosis Research Group, Biosciences  
14          Institute, Newcastle University, United Kingdom, <sup>7</sup> Polypharma Biologics, Utrecht, The  
15          Netherlands

17          *Running title: Neutrophil Cxcr4 impacts tolerance during sepsis*

18          *Text word count: 4746*

19          *Abstract word count: 141*

21          *Corresponding Author:*

22          Sylvia Knapp, MD, PhD,

23          Laboratory of Infection Biology, Dept. of Medicine 1, Medical University Vienna

24          Waehringer Guertel 18-20, 1090 Vienna, Austria

25          Phone: +43-1-40400-51390, Fax: +43-1-40400-51670

26          ORCID ID: 0000-0001-9016-5244

27          E-mail: [sylvia.knapp@meduniwien.ac.at](mailto:sylvia.knapp@meduniwien.ac.at)

---

<sup>†</sup> current affiliation: Pathology Überlingen, Germany

1 **Summary**

2 We show that a B cell/neutrophil interaction in the bone marrow facilitates tissue tolerance during  
3 severe sepsis. By affecting neutrophil Cxcr4 expression, B cells can impact neutrophil effector  
4 functions. Finally, therapeutic activation of Cxcr4 successfully promoted tissue tolerance and  
5 prevented liver damage during sepsis.

6

7 **Abstract**

8 Sepsis is a life-threatening condition characterized by uncontrolled systemic inflammation and  
9 coagulation, leading to multi-organ failure. Therapeutic options to prevent sepsis-associated  
10 immunopathology remain scarce.

11 Here, we established a model of long-lasting disease tolerance during severe sepsis, manifested  
12 by diminished immunothrombosis and organ damage in spite of a high pathogen burden. We  
13 found that, both neutrophils and B cells emerged as key regulators of tissue integrity. Enduring  
14 changes in the transcriptional profile of neutrophils, included upregulated Cxcr4 expression in  
15 protected, tolerant hosts. Neutrophil Cxcr4 upregulation required the presence of B cells,  
16 suggesting that B cells promoted tissue tolerance by suppressing tissue damaging properties of  
17 neutrophils. Finally, therapeutic administration of a Cxcr4 agonist successfully promoted tissue  
18 tolerance and prevented liver damage during sepsis. Our findings highlight the importance of a  
19 critical B-cell/neutrophil interaction during sepsis and establish neutrophil Cxcr4 activation as a  
20 potential means to promote disease tolerance during sepsis.

21

22 **Key words**

23 Sepsis; Organ failure; Disease tolerance mouse model; Tissue protection; B cells, Neutrophils,  
24 Cxcr4

25

## 1 **Introduction**

2 Sepsis is a life-threatening condition triggered by severe infections with bacteria, viruses or fungi.  
3 In spite of the successful use of antimicrobial therapies, mortality rates remain high with up to  
4 50%, (1, 2). The main determinant of sepsis-associated mortality is rarely the pathogen, but  
5 instead the combination of dysregulated systemic inflammation, immune paralysis and hemostatic  
6 abnormalities that together cause multi-organ failure (3). Upon pathogen sensing, ensuing  
7 inflammation promotes the activation of coagulation, which in turn generates factors that further  
8 amplify inflammation, thus creating a vicious, self-amplifying cycle. These events result in systemic  
9 inflammation and the widespread formation of microvascular thrombi that together cause vascular  
10 leak, occlusion of small vessels and ultimately multi-organ failure (4, 5). Whether a patient  
11 suffering from sepsis enters this fatal circuit of immunopathology or instead is able to maintain  
12 vital organ functions and survives sepsis is not well understood (6-8).

13  
14 The concept of “disease tolerance” describes a poorly studied, yet essential host defense strategy,  
15 on top of the well understood strategies of avoidance and resistance (9). While avoidance means  
16 preventing pathogen exposure and infection, and resistance aims to more efficiently reduce the  
17 pathogen load in the course of an established infection, disease tolerance involves mechanisms,  
18 which minimize the detrimental impact of infection-associated immunopathology, thus improving  
19 host fitness despite the infection (9, 10). To this end, a number of mechanisms that shape the  
20 process of disease tolerance have been suggested, including alterations in cellular metabolism,  
21 DNA damage response, tissue remodeling or oxidative stress (10). However, little is known about  
22 the specific contribution of immune cells to disease tolerance during severe infections, and  
23 therapeutic options to increase disease tolerance are limited due to a lack of knowledge about  
24 detailed molecular and cellular tolerance mechanisms (6-8).

25  
26 In this study, we investigated mechanisms of disease tolerance, by comparing tolerant and  
27 sensitive hosts during a severe bacterial infection. While sensitive animals developed severe  
28 coagulopathy and tissue damage during sepsis, tolerant animals were able to maintain tissue  
29 integrity in spite of a high bacterial load. Tolerance was induced by the prior exposure of animals  
30 to a single, low-dose of LPS and could be uncoupled from LPS-induced suppression of cytokine  
31 responses. We provide evidence for a deleterious and organ-damaging interaction between B  
32 cells and neutrophils during sepsis in sensitive animals, while in tolerant animals neutrophils and  
33 B cells jointly orchestrated tissue protection during sepsis, which was associated with  
34 transcriptional reprogramming of neutrophils and B cell dependent upregulation of neutrophil

Gawish *et al.* 2022

1 Cxcr4. Our data suggest that B cells can modulate the tissue damaging properties of neutrophils  
2 by influencing neutrophil Cxcr4 signaling. Consequently, the administration of a Cxcr4 agonist  
3 prevented sepsis-associated microthrombosis and resulting tissue damage, thereby exposing a  
4 potential therapeutic strategy to foster tissue tolerance in severe sepsis.

## 1 **Results**

### 2 *LPS pre-exposure induces long-term tissue tolerance during Gram-negative sepsis*

3 To establish a model for the study of tissue tolerance during sepsis we challenged mice  
4 intravenously (i.v.) with a subclinical dose of LPS 1 day, 2 weeks, 5 weeks or 8 weeks,  
5 respectively, prior to the induction of Gram-negative sepsis by intraperitoneal (i.p.) injection of the  
6 virulent *E. coli* strain O18:K1. While LPS pretreatment 24h prior to infection significantly improved  
7 pathogen clearance, any longer period (i.e. 2-8 weeks) between LPS administration and infection  
8 did not affect the bacterial load when compared to control mice (Figure 1A, Figure S1A).  
9 Importantly though, all LPS pre-treated groups were substantially protected from sepsis-  
10 associated tissue damage, illustrated by the absence of elevated liver transaminase (ASAT and  
11 ALAT) plasma levels (Figure 1B). Thus, short-term (24h) LPS pre-exposure improved resistance  
12 to infection and consequently tissue integrity, while long-term (2-8 weeks) LPS pre-exposure  
13 enabled the maintenance of tissue integrity irrespective of a high bacterial load, which per  
14 definition resembles disease tolerance.

15 To dissect the underlying mechanism of tissue tolerance, we thus performed all subsequent  
16 experiments by treating mice with either LPS or saline two weeks prior to bacterial infection,  
17 allowing us to compare tolerant with sensitive hosts. Mice were either sacrificed two weeks after  
18 LPS pretreatment to assess changes in tolerant hosts prior to infection, or six to 18h after *E. coli*  
19 infection to determine early (6h) or late inflammation and organ damage (18h), respectively, during  
20 sepsis (Fig. 1C). Doing so, we observed that organ protection (Figure 1B) was associated with the  
21 absence of liver necrosis (Figure 1D and 1E), while inflammatory cytokine and chemokine levels  
22 were indistinguishable between sensitive and tolerant mice 18h post infection (p.i.) (Figure 1F,  
23 Figure S1B and 1C). A major cause of organ damage during sepsis is the disseminated activation  
24 of coagulation, which is characterized by systemic deposition of micro-thrombi and substantial  
25 platelet consumption, resulting in a critical reduction in tissue perfusion (4-6). While we discovered  
26 a severe decline in platelet numbers upon *E. coli* infection in sensitive mice, tolerant mice  
27 maintained significantly higher blood platelet counts (Figure 1G) and, in sharp contrast to sensitive  
28 animals, showed almost no deposition of micro-thrombi in liver (Figure 1H and 1I) and lung  
29 sections (Figure S1D), indicating that tissue tolerance occurred systemic and not organ specific.  
30 Considering that LPS exposure itself can impact coagulation factor levels and blood platelet  
31 numbers (11, 12), we importantly found similar platelet counts in sensitive and tolerant mice at the  
32 onset of *E. coli* infection (2 weeks post LPS) (Figure 1G). In addition, we did not detect any  
33 indication for an altered coagulation potential in tolerant mice before sepsis induction, as both  
34 groups showed a similar plasma thrombin generation potential prior to infection (Figure 1J left

1 panel, Figure S1E). However, compared to sensitive animals, the thrombin generation capacity  
 2 was only preserved in tolerant mice after infection (18h p.i.), suggesting that tolerance  
 3 mechanisms prevented sepsis-associated consumption coagulopathy (Figure 1J right panel and  
 4 1K). Taken together, low-dose LPS pretreatment prevented the formation of micro-thrombi and  
 5 induced a long-lasting state of tissue tolerance during subsequent sepsis.  
 6

Figure 1

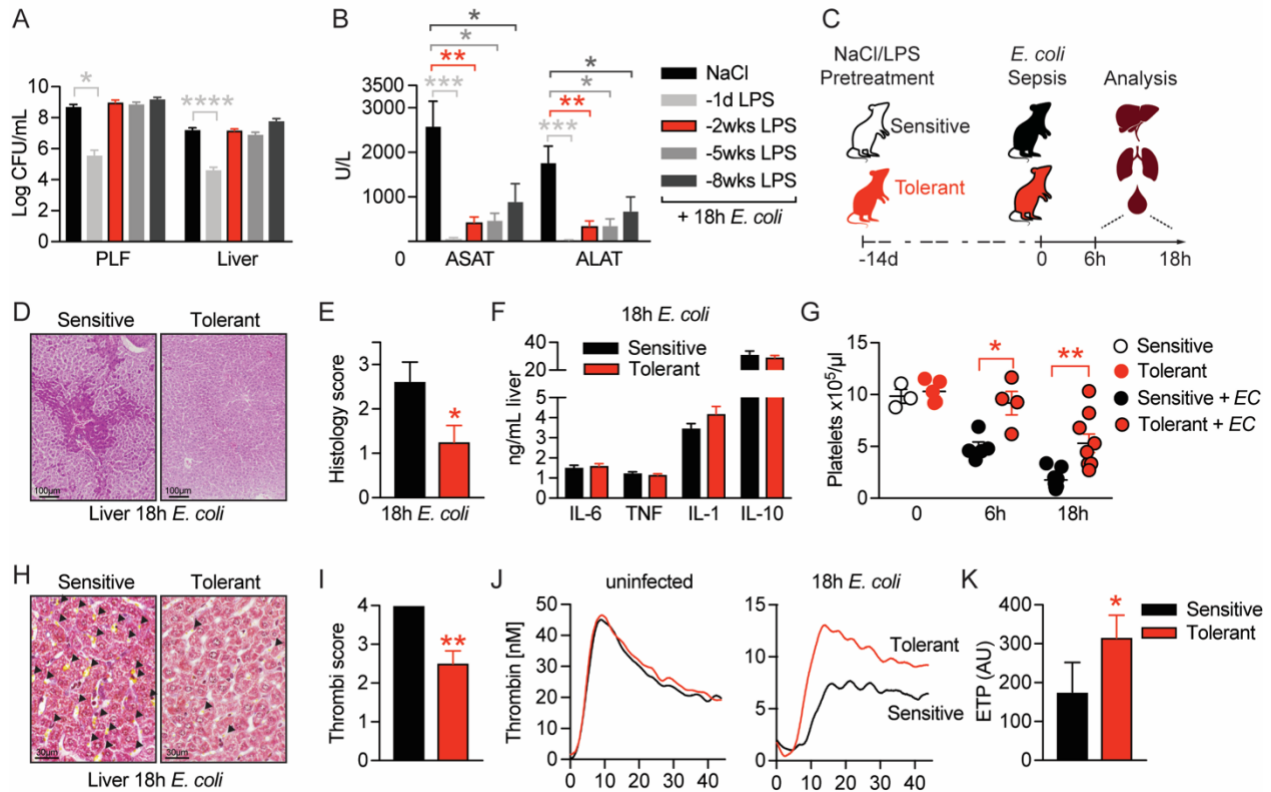

7  
 8 **Figure 1: LPS pre-exposure induces long-term tissue tolerance during Gram-negative sepsis**  
 9 **(A)** *E. coli* CFU 18h p.i. in peritoneal lavage fluid (PLF) and liver of mice, which were pretreated  
 10 with LPS or NaCl at depicted time points before infection.  
 11 **(B)** ASAT and ALAT plasma levels at 18h p.i. of mice, pretreated with LPS or NaCl at indicated  
 12 time points.  
 13 **(C)** Schematic depiction of the treatment procedure and endpoints.  
 14 **(D-E)** H&E staining and pathology scores of liver sections from mice pretreated with LPS or NaCl  
 15 2 weeks earlier, and infected with *E. coli* for 18h.  
 16 **(F)** Liver cytokine levels at 18h p.i.  
 17 **(G)** Blood platelet counts at 2 weeks post LPS/NaCl pretreatment, and 6h or 18h post infection.

1 (H-I) Martius, Scarlet and Blue (MSB) fibrin staining of liver sections and scoring of liver  
2 microthrombi at 18h p.i.

3 (J) *In vitro* thrombin generation capacity of plasma from LPS/NaCL pretreated uninfected and  
4 infected mice.

5 (K) Endogenous thrombin potential (ETP) of plasma samples 18h p.i.

6 Data in (A) and (B) are pooled from 2-3 independent experiments (n = 6-7/experimental group).

7 Data in (G) are pooled from 2 independent experiments (n = 1-3/experimental group for uninfected

8 and 4-5 for infected mice). All other data are representative for two or more independent

9 experiments (n = 8/experimental group). All data are and presented as mean +/- SEM. \* p ≤ 0.05,

10 \*\* p ≤ 0.01, \*\*\* p ≤ 0.001 and \*\*\*\* p ≤ 0.0001.

---

11  
12 *B cells regulate tissue tolerance during sepsis independent of early inflammatory*  
13 *responses*

14 Considering the long-term protective effect of LPS pre-exposure in tolerant animals, we next

15 tested the possibility that long-lived immune cells like lymphocytes might regulate tissue tolerance

16 during sepsis. Strikingly, the absence of lymphocytes, as in Rag2 deficient (Rag2<sup>-/-</sup>) animals,

17 already resulted in profoundly reduced liver damage upon bacterial infection of naïve, sensitive

18 mice and fully abrogated further LPS-induced tissue tolerance without affecting the bacterial load

19 (Figure 2A, S2A and S2B). This indicated that lymphocytes on the one hand importantly

20 contributed to the sensitivity of animals to sepsis-associated organ damage in naïve mice, and on

21 the other hand were essential in mediating LPS-induced tissue protection in tolerant hosts. In

22 support of this, adoptive transfer of splenocytes into Rag2<sup>-/-</sup> mice reestablished LPS-induced

23 tissue tolerance (Figure 2A). Depleting CD8 or CD4 T cells, respectively, prior to LPS exposure

24 (Figure 2B and S2C) neither affected the difference between sensitive and tolerant animals to

25 organ damage (Figure 2C) nor the bacterial load (Figure S2D) upon *E. coli* infection. In contrast,

26 B cell deficiency (J<sub>H</sub>T<sup>-/-</sup> mice) fully prevented the development of tissue damage during sepsis

27 irrespective of tolerance induction (Figure 2D) and despite a high bacterial load (Figure S2E).

28 Furthermore, adoptive transfer of B cells into Rag2<sup>-/-</sup> mice (Figure 2E) aggravated liver damage

29 upon *E. coli* infection in sensitive and reestablished tissue protection in tolerant mice (Figure 2F).

30 These findings indicated that B cells, but not T cells, played an ambiguous role as they were

31 involved in both, sepsis-associated organ damage and the establishment of LPS-triggered tissue

32 tolerance. We then tested if splenectomy would replicate the protective effects of B cell deficiency

33 during sepsis and interestingly found that splenectomy was associated with reduced liver damage

34 in naïve, sensitive mice, but, in contrast to complete lymphocyte deficiency, not sufficient to



1 abrogate LPS-induced tissue protection in tolerant animals (Figure 2G and S2F). This suggested  
 2 that mature splenic B cells contributed to tissue damage during severe infections, while other, not  
 3 spleen derived, B cell compartments were instrumental in driving disease tolerance.  
 4 Given that B cells were shown to promote early production of proinflammatory cytokines such as  
 5 IL-6 during sepsis in a type I IFN dependent manner (13), we next investigated if LPS pretreatment  
 6 induced tissue tolerance by dampening B cell driven inflammatory responses. Six hours post *E.*  
 7 *coli* infection, we found tolerant wild type mice to exhibit lower IL-6 levels in blood and liver (Figure  
 8 2H), as well as lower amounts of important regulators of peritoneal leukocyte migration (14, 15),  
 9 like CXCL1 and CCL2 (Figure S2G) when compared to sensitive control mice. However,  
 10 lymphocyte deficient *Rag2*<sup>-/-</sup> animals, in whom tissue tolerance could not be induced (Figure 2A  
 11 and S2A), showed comparable reductions in these mediators of early inflammation in response to  
 12 LPS pretreatment (Figure 2I and S2H). Further, tolerance during sepsis was induced independent  
 13 of interferon- $\alpha/\beta$  receptor (IFNAR) signaling (Figure 2J and S2I) and the anti-inflammatory NF- $\kappa$ B  
 14 subunit p50 (NF- $\kappa$ B1) (Figure 2K and S2J), which has been shown to mediate the suppression of  
 15 cytokine production during endotoxin tolerance *in vitro* (16, 17). These data suggested that in  
 16 tolerant hosts, B cells contributed to tissue protection during sepsis, and that an LPS mediated  
 17 modulation of early inflammation is unlikely to explain these protective effects.

Figure 2

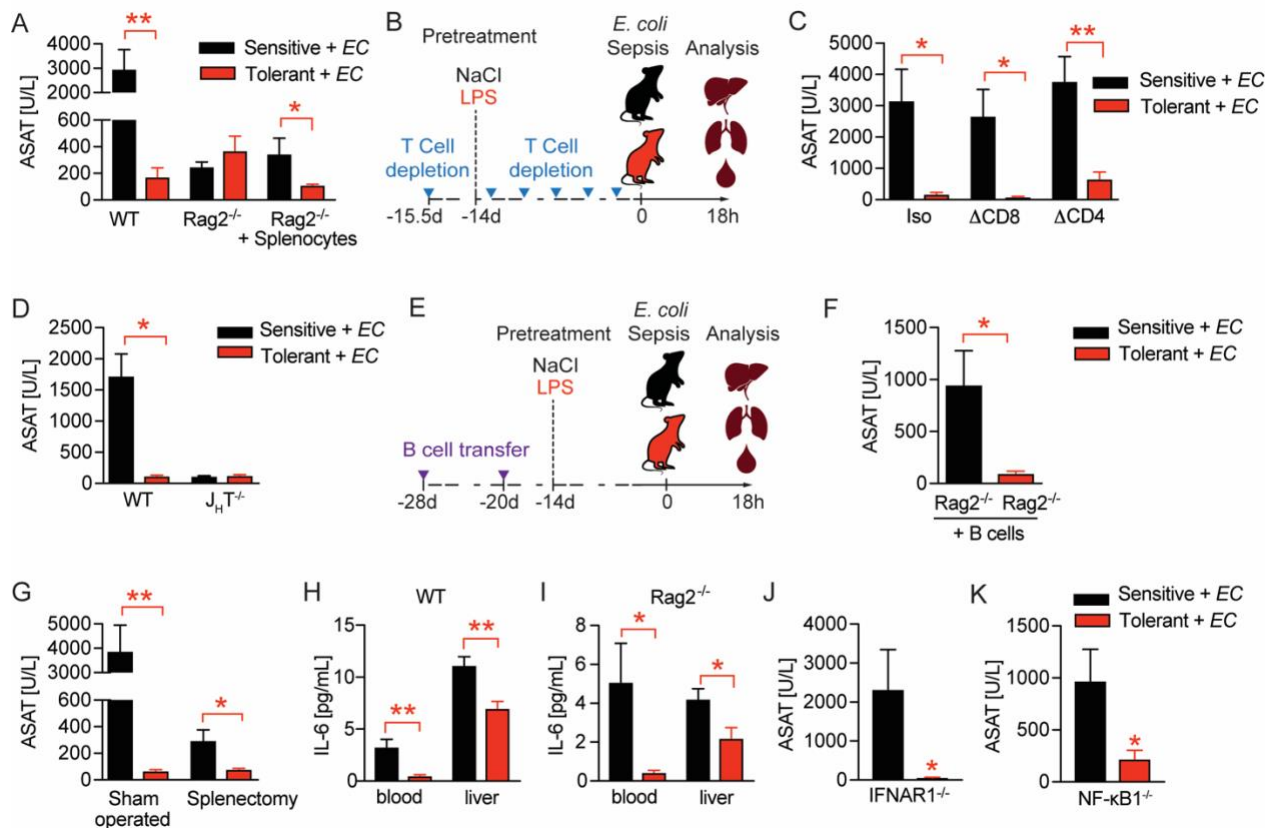



1 *Figure 2: B cells regulate tissue tolerance during sepsis independent of early inflammatory*  
2 *responses*

3 **(A)** ASAT plasma levels at 18h p.i. with *E. coli*, of LPS or NaCl pretreated wildtype or lymphocyte  
4 deficient mice (RAG2<sup>-/-</sup>), which have received either PBS or splenocytes i.v. 3 weeks prior  
5 infection.

6 **(B)** Schematic depiction of the treatment procedure for T cell depletion experiments.

7 **(C)** ASAT plasma levels 18h p.i. with *E. coli* of mice, which were depleted from CD4<sup>+</sup> or CD8<sup>+</sup> T  
8 cells prior to LPS or NaCl pretreatment.

9 **(D)** ASAT plasma levels of LPS or NaCl pretreated wildtype or B cell deficient (J<sub>H</sub>T<sup>-/-</sup>) mice at 18h  
10 p.i. with *E. coli*.

11 **(E)** Schematic depiction of the treatment procedure for splenocyte and B cell transfer experiments.

12 **(F)** ASAT plasma levels of LPS or NaCl pretreated Rag2<sup>-/-</sup> mice at 18h p.i. with *E. coli*, which have  
13 been reconstituted with bone marrow derived B cells 3 weeks before infection.

14 **(G)** ASAT plasma levels at 18h p.i. with *E. coli* of LPS or NaCl pretreated mice, which were  
15 splenectomized or sham operated 1 week before LPS or NaCl pre-exposure (i.e. 3 weeks before  
16 infection).

17 **(H-I)** IL-6 levels in plasma and liver of NaCl or LPS pretreated wildtype or Rag2<sup>-/-</sup> mice at 6h p.i.  
18 with *E. coli*.

19 **(J)** ASAT plasma levels of NaCl or LPS pretreated IFNAR1<sup>-/-</sup> mice at 18h p.i. with *E. coli*.

20 **(K)** ASAT plasma levels of NaCl or LPS pretreated NF-κB1<sup>-/-</sup> mice at 18h p.i. with *E. coli*.

21 Data in (A) and (G-J) and are representative out of 2-3 experiments (n= 3-8/experimental group).

22 Data in (D) and (K) are pooled from 2 independent experiments (n = 2-7/experimental group).

23 Data in (C) and (F) are from a single experiment (n = 6-8/group). Data are and presented as mean  
24 +/- SEM. \* p ≤ 0.05 and \*\* p ≤ 0.01.

25

### 26 *Disease tolerance is associated with rearranged B cell compartments*

27 We next compared the B cell compartment in sensitive and tolerant mice and analyzed different  
28 B cell populations in spleen and bone marrow 2 weeks after saline or LPS treatment. Tolerance  
29 was associated with a mild increase in spleen weight (Figure S3A) and total spleen cell counts,  
30 together with an expansion of B cell numbers (Figure 3A). Of note, tolerance-induction by LPS  
31 treatment even caused an expansion of transplanted B cells in spleens of Rag2<sup>-/-</sup> animals (Figure  
32 3B). In parallel, while the total number of bone marrow cells remained indistinguishable (Figure  
33 S3B), we found bone marrow B cell numbers increased in tolerant mice, as compared to sensitive  
34 controls (Figure 3B). Further analysis of B cell subsets revealed an increase of B1 B cell numbers

1 (IgM<sup>hi</sup> CD23<sup>-</sup> CD43<sup>hi</sup> CD21<sup>-</sup>), a subset that also includes the B1-like innate response activator (IRA)  
 2 B cells, in spleen and bone marrow (Figure 3D-F and S3C), as well as elevated numbers of pre B  
 3 and immature and transitional B cells (iB/tB) in the bone marrow (Figure 3F and Figure S3C). In  
 4 sharp contrast, total numbers of follicular (FO) and marginal zone (MZ) B cells did not change  
 5 upon tolerance induction (Figure 3D).  
 6 B1 B and IRA B cell-derived IgM was shown earlier to exert tissue protective properties and has  
 7 been proposed as a possible mechanism of disease tolerance (18-24). In line with this, we found  
 8 elevated plasma IgM levels in tolerant mice prior to infection, which – in contrast to sensitive,  
 9 control animals – returned to baseline during sepsis, indicating LPS-induced induction of IgM, and  
 10 consumption of IgM during sepsis in tolerant animals (Figure 3G). We therefore tested if IgM was  
 11 an essential soluble mediator responsible for the tissue protection in tolerant mice. Unexpectedly  
 12 though, mice lacking soluble IgM developed less severe organ damage, and LPS-pretreatment  
 13 still induced tissue tolerance during sepsis (Figure 3H, Figure S3D). Taken together, tissue  
 14 tolerance was associated with long-term changes in the B cell compartments in the spleen and  
 15 bone marrow, and the B cells' tissue protective effects in tolerant mice occurred in an IgM-  
 16 independent manner.

Figure 3

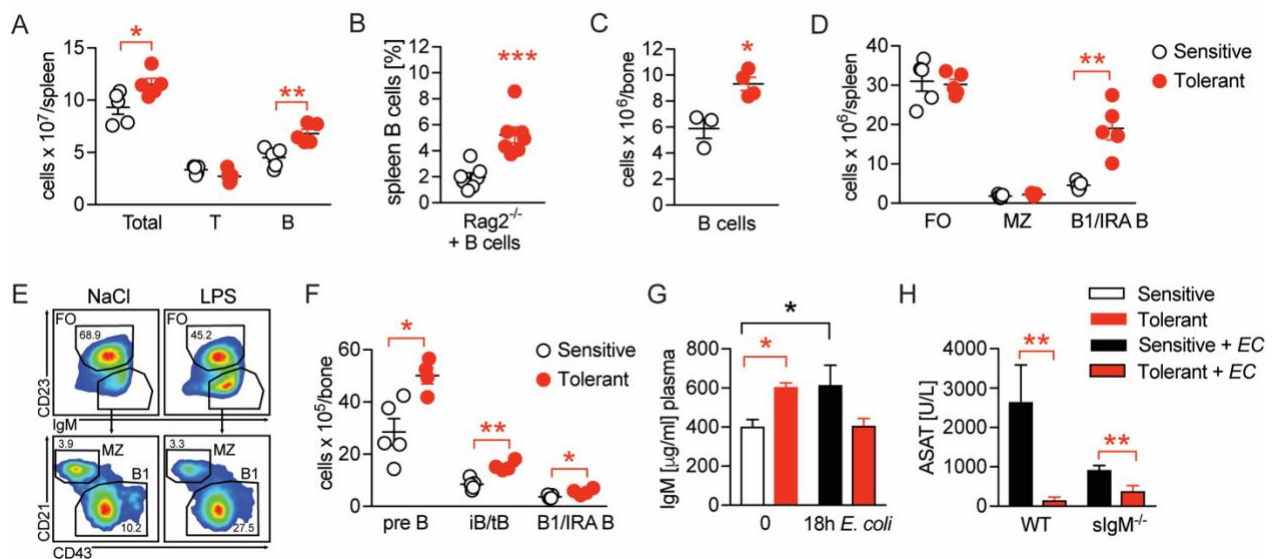

17  
 18 **Figure 3: Disease tolerance is associated with rearranged B cell compartments**

19 **(A)** Flow-cytometric analysis of B and T cells in the spleen of mice treated with LPS or NaCl 2  
 20 weeks earlier.

21 **(B)** Flow-cytometric analysis of B cells in spleens of Rag2<sup>-/-</sup> mice treated with LPS or NaCl 2 weeks  
 22 earlier, and reconstituted with GFP<sup>+</sup> B cells before LPS/NaCl.

23 **(C)** CD19<sup>+</sup> B cells per femur of mice treated with NaCl or LPS 2 weeks earlier.

1 (D) Flow-cytometric analysis of FO, MZ and B1/IRA B cells in spleens of mice treated with LPS or  
2 NaCl 2 weeks earlier.

3 (E) Gating strategy for splenic B cell subsets.

4 (F) Flow-cytometric analysis of Pre B, iB/tB and B1/IRA B cells in the bone marrow of mice treated  
5 with LPS or NaCl 2 weeks earlier.

6 (G) IgM plasma levels in NaCl or LPS pretreated uninfected mice and 18h p.i. with *E. coli*.

7 (H) ASAT plasma levels of NaCl or LPS pretreated WT and sIgM<sup>-/-</sup> mice 18h p.i. with *E. coli*.

8 Data in (A) and (C-F) and are representative out of 2-3 experiments (n= 3-8/experimental group).

9 Data in (G-H) are pooled from 2 independent experiments (n = 3-7/experimental group). Data in

10 (B) are from a single experiment (n = 7/group) and all data are and presented as mean +/- SEM.

11 \* p ≤ 0.05 and \*\* p ≤ 0.01.

---

12

### 13 *B cells impact neutrophils, the key effectors driving sepsis-induced tissue damage*

14 Having determined the importance of B cells in mediating tissue tolerance during sepsis, and

15 having ruled out B-cell mediated inflammation or IgM effects as driving forces, we wondered if B

16 cells might impact on the functionalities of other immune effector cells in sepsis. To assess the

17 tissue damaging potential of candidate effector cells in our model, we depleted neutrophils ( $\Delta$ PMN)

18 (Figure S4A), platelets ( $\Delta$ Plt) (Figure S4B) or monocytes and macrophages ( $\Delta$ M) (Figure S4C) in

19 sensitive and tolerant mice, respectively, prior to *E. coli* infection. Surprisingly, monocyte and

20 macrophage depletion neither influenced sepsis-induced tissue damage in sensitive animals nor

21 did it impact on LPS-induced tissue tolerance (Figure 4A). Platelet or neutrophil depletion, in

22 contrast, already exerted tissue protective effects in both groups, illustrated by greatly reduced

23 ASAT levels in sensitive and tolerant mice (Fig. 4A). However, while LPS-pretreatment still

24 enhanced tissue tolerance in  $\Delta$ Plt mice, it did not result in any additive beneficial effects in  $\Delta$ PMN

25 animals (Figure 4A), similar to what we had observed upon B cell deficiency (Figure 2D). These

26 data support the reported role of platelets and neutrophils in promoting tissue damage during

27 sepsis (4, 5) and proved neutrophils to be key effector cells of tissue protection in tolerant animals.

28 Of note, no significant impact on the pathogen load was detectable in any of the groups (Figure

29 S4D).

30 Considering our observation of LPS induced organ protection in a B cell and neutrophil dependent

31 manner, we hypothesized an alliance between neutrophils and B cells in regulating tissue

32 tolerance during sepsis. In steady state, up to 70% of CD45<sup>+</sup> bone marrow cells are composed of

33 B cells and neutrophils, where both populations constitutively reside and mature by sharing the

34 same niche (25). We therefore first analyzed bone marrow B cell and neutrophil dynamics after

1 LPS challenge, and discovered substantial stress-induced granulopoiesis, peaking around day  
2 four post LPS exposure, while B cells were regulated in a reciprocal fashion as they vanished by  
3 day four post LPS injection, to then increase and remain elevated two weeks post LPS treatment  
4 (Figure 4B and 3C) in tolerant, as compared to sensitive animals. At the same time total and  
5 relative neutrophil numbers in the bone marrow remained slightly reduced in tolerant mice, but  
6 elevated in the absence of B cells (Figure 4C and S4E).

7 Next, we assessed differences between sensitive and tolerant animals in infection-induced  
8 peripheral neutrophil migration and abundance, depending on the presence or absence of  
9 lymphocytes or B cells, respectively. While tissue tolerance was associated with elevated  
10 neutrophil abundance in blood and PLF of septic wild type mice (Figure 4D and 4E), neutrophil  
11 extravasation into tissues such as the liver and lung were substantially reduced (Figure 4F-G and  
12 S4F). In both  $Rag2^{-/-}$  and  $J_H T^{-/-}$  mice, LPS pretreatment did not cause increased blood neutrophils  
13 nor a significant accumulation in the PLF during sepsis (Figure 4H-I and S4G-H). However,  
14 infection-induced neutrophil migration into liver tissue was still reduced after LPS pretreatment in  
15  $J_H T^{-/-}$  mice (Figure 4J), but not in  $Rag2^{-/-}$  animals (Figure S4I). This suggested that in tolerant  
16 animals, B cells might affect systemic neutrophil trafficking and turnover after LPS-pre-exposure,  
17 whereas the suppressed neutrophil extravasation to the livers of tolerant mice occurred  
18 independent of B cells. In support of this idea, we discovered that blood neutrophils of tolerant  
19 mice expressed lower CD62L levels upon infection than those of sensitive controls, and that this  
20 phenotype required the presence of B cells (Figure 4K). While CD62L has been studied  
21 extensively for its importance in neutrophil adhesion and rolling over the vascular endothelium  
22 (26), a recent study has identified decreased CD62L expression indicative of neutrophil aging, a  
23 process that is counteracted by *Cxcr4* signaling, the master regulator of neutrophil trafficking  
24 between the bone marrow and the periphery (27-29). Based on these findings, we hypothesized  
25 that B cells might regulate sensitivity and tolerance during sepsis by affecting the functional  
26 plasticity and tissue damaging properties of neutrophils.

Figure 4

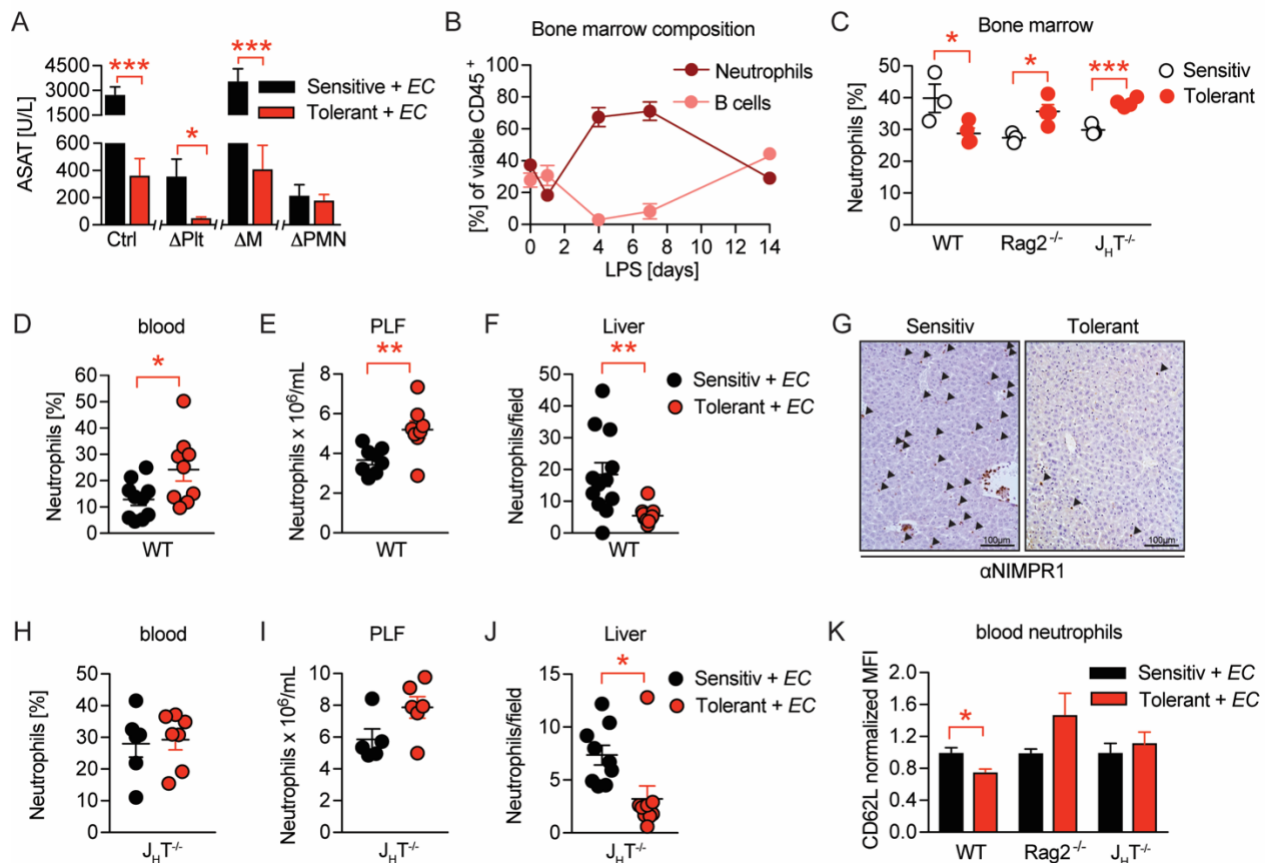

- 1
- 2 **Figure 4: B cells impact neutrophils, the key effectors driving sepsis-induced tissue damage**
- 3 **(A)** ASAT plasma levels 18h p.i. with *E. coli* in LPS or NaCl pretreated mice, in which platelets,
- 4 monocytes/macrophages or neutrophils, respectively, were depleted before infection.
- 5 **(B)** Flow-cytometric analysis of bone marrow neutrophils and B cells after i.v. administration of
- 6 LPS at time = 0h.
- 7 **(C)** Flow-cytometric analysis of neutrophils in the bone marrow of wildtype, *Rag2*<sup>-/-</sup> and *J<sub>H</sub>T*<sup>-/-</sup> mice
- 8 2 weeks after LPS or NaCl treatment.
- 9 **(D-E)** Flow-cytometric analysis of neutrophils of wildtype mice pre-treated with NaCl or LPS,
- 10 respectively, and infected for 18h with *E. coli*, in blood (D) and PLF (E).
- 11 **(F-G)** Quantification of (F) immunohistological staining for NIMP-R1<sup>+</sup> cells on liver sections (G) of
- 12 mice pre-treated with NaCl or LPS, respectively, and infected with *E. coli* for 18h.
- 13 **(H-J)** Flow-cytometric analysis of neutrophils 18h p.i. with *E. coli* in blood (H), PLF (I) and liver (J)
- 14 of *J<sub>H</sub>T*<sup>-/-</sup> mice.
- 15 **(K)** Flow-cytometric analysis of blood neutrophil CD62L expression of WT, *Rag2*<sup>-/-</sup> and *J<sub>H</sub>T*<sup>-/-</sup> mice
- 16 at 18h p.i. with *E. coli*.

1 Data in (A) shown for the control group and neutrophil depletion are pooled from 2 independent  
2 experiments (n = 4-6/experimental group), platelet and monocyte/ macrophage depletion  
3 represent a single experiment (n = 8/group). Data in (B), (D-E), (F) and (J) are pooled from 2  
4 independent experiments (n = 4-8/experimental group). Data in (H-I) are representative of 2  
5 experiments (n = 5-8/group). Data in (K) are from a single experiment (n = 4-8/group). All data are  
6 presented as mean +/- SEM. \* p ≤ 0.05, \*\* p ≤ 0.01 and \*\*\* p ≤ 0.001.

---

7

### 8 *Neutrophil tissue damaging properties are modulated by bone marrow B cells via Cxcr4*

9 To assess the functional alterations in neutrophils, which confer tissue protection and tolerance  
10 during sepsis, we sorted neutrophils from the blood and bone marrow of sensitive and tolerant  
11 mice, i.e. 2 weeks post NaCl or LPS treatment but prior to infection, and performed RNA  
12 sequencing (Figure S5A). Despite the supposedly short life span of neutrophils, tolerant mice  
13 exhibited a sustained transcriptional reprogramming of the neutrophil pool. Principal component  
14 analysis of the 1000 most variable genes revealed clustering of neutrophils according to the site  
15 of sampling (Figure 5A), likely reflecting the heterogeneity of neutrophils in bone marrow versus  
16 mature cells in blood (30, 31). Samples further separated according to treatment (Figure 5A) and  
17 we identified a substantial number of tolerance associated, differentially expressed genes (DEGs)  
18 in both, bone marrow and blood neutrophils (Figure S5B-D, Supplementary Table 1 and 2). Gene  
19 ontology (GO) enrichment analysis of blood neutrophil DEGs exhibited an enrichment of genes  
20 associated with immunity and defense responses (Fig. 5B). Strikingly, bone marrow neutrophils  
21 of tolerant mice showed an enrichment of genes associated with cell migration, trafficking and  
22 chemotaxis (Figure 5C), such as genes involved in Cxcl12/Cxcr4 signaling including Cxcr4 itself  
23 (Figure S5E).

24 Considering the reported importance of Cxcr4 signaling in neutrophil trafficking between the bone  
25 marrow and periphery (27-29), we verified an upregulation of Cxcr4 on bone marrow derived  
26 neutrophils of tolerant mice compared to sensitive control mice on a transcriptional (Figure 5D)  
27 and protein level (Figure S5F). Importantly, this Cxcr4 induction depended on B cells, as Cxcr4  
28 expression levels did not change in neutrophils isolated from LPS pre-exposed J<sub>H</sub>T<sup>-/-</sup> mice (Figure  
29 5D and S5F). Based on these findings and the recent observation that Cxcr4 deficient neutrophils  
30 promote aging and neutrophil-induced vascular damage (27), we hypothesized that B cells impact  
31 the life cycle of neutrophils by influencing neutrophil Cxcr4 signaling, which in turn might promote  
32 tissue tolerance during a subsequent sepsis. We therefore tested whether targeting Cxcr4 would  
33 be sufficient to induce tissue tolerance during sepsis and treated mice with increasing doses of  
34 the Cxcr4 peptidic agonist ATI2341, or a well-established dose of the Cxcr4 antagonist AMD3100



1 (Figure 5E). Strikingly, administration of the Cxcr4 agonist ATI2341 prevented sepsis-induced  
 2 tissue damage in a dose dependent manner, whereas blocking Cxcr4 had no impact (Figure 5F).  
 3 Liver histology reflected the tissue protective effects of ATI2341 treatment, while control and  
 4 ADM3100 treated mice developed profound liver necrosis (Figure 5G). At the same time, none of  
 5 these treatments altered the bacterial load (Figure 5H), suggesting that activation of Cxcr4 during  
 6 sepsis induced tissue tolerance.  
 7 Taken together, by studying a model of tissue tolerance during sepsis, we here revealed a  
 8 crosstalk between neutrophils and B cells in the bone marrow, in which B cells influence  
 9 neutrophils likely by modulating Cxcr4 related pathways. In line with this idea, we found that  
 10 administration of a Cxcr4 agonist limited tissue damage during severe sepsis, indicating that Cxcr4  
 11 signaling restrains the tissue damaging properties of neutrophils during infection.

Figure 5

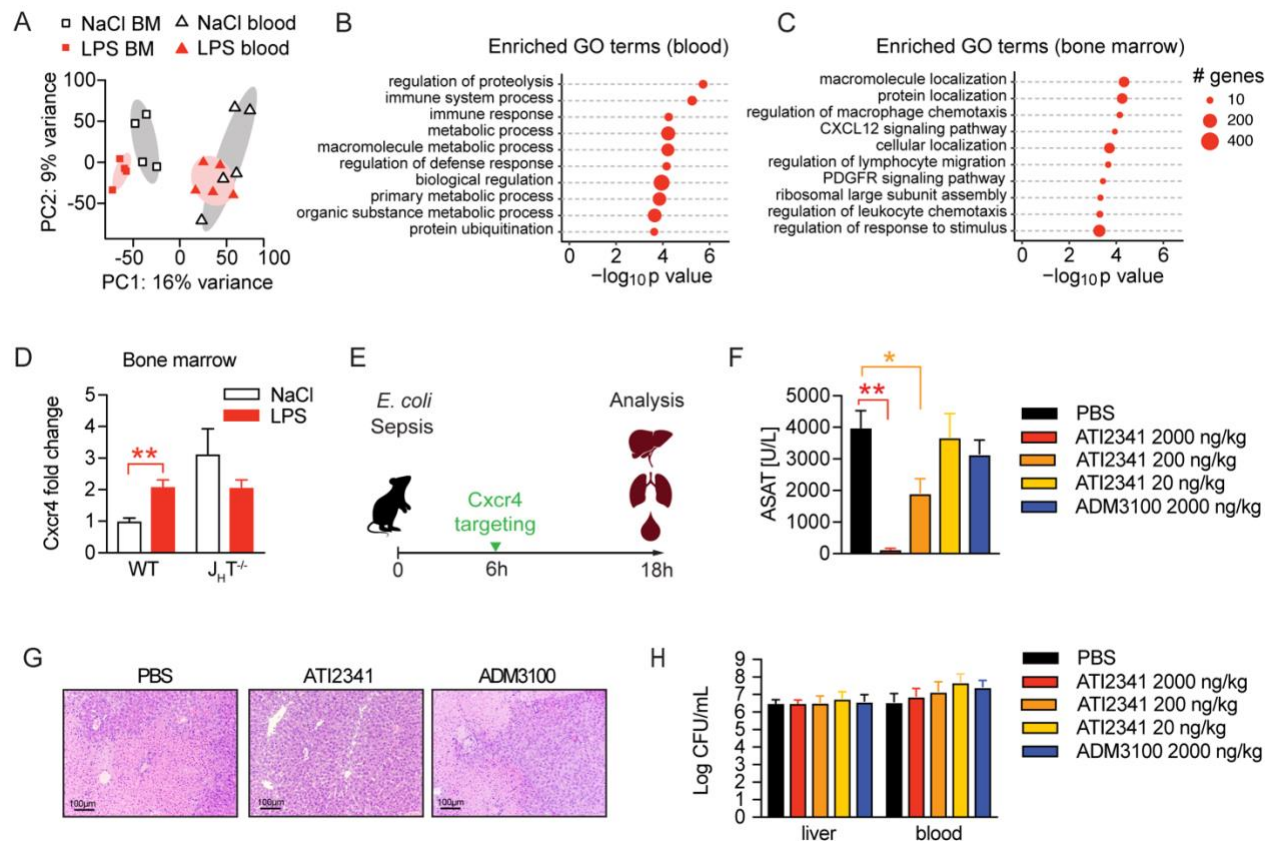

12  
 13 *Figure 5: Neutrophil tissue damaging properties are modulated by bone marrow B cells via Cxcr4*  
 14 (A) PCA of the top 1000 most variable genes expressed by neutrophils isolated from blood or  
 15 bone marrow, of mice pretreated with LPS or NaCl 2 weeks earlier.  
 16 (B-C) GO enrichment analysis of blood and bone marrow neutrophil DEGs.



- 1 **(D)** *Cxcr4* mRNA expression in sorted bone marrow neutrophils from WT and  $J_H T^{-/-}$  mice,  
2 pretreated with NaCl or LPS 2 weeks earlier.
- 3 **(E)** Schematic depiction of the treatment procedure for the therapeutic application of a *Cxcr4*  
4 agonist (ATI2341) and a *Cxcr4* antagonist (ADM3100) at indicated doses.
- 5 **(F)** ASAT plasma levels of mice 18h p.i. with *E. coli*, which were treated with depicted doses of  
6 *Cxcr4* ligands (agonist ATI2341 or antagonist ADM3100, respectively) 6h p.i.
- 7 **(G)** Representative liver histology (H&E stain) of mice 18h p.i. with *E. coli*, treated with PBS or the  
8 indicated *Cxcr4* ligands (agonist ATI2341, antagonist ADM3100, at 2000ng/kg) 6h p.i.
- 9 **(H)** Liver and blood CFUs of mice 18h p.i. with *E. coli* of mice, which were i.v. treated with depicted  
10 doses of *Cxcr4* ligands (agonist ATI2341 and antagonist ADM3100, respectively) at 6h p.i.
- 11 Data in (A-C) are from a single experiment (n = 4-5/group). Data in (D) are from an independent  
12 experiment (n = 3-4), versus data shown in (A-C). Data in (F-H) are representative of 2  
13 independent experiments (n = 3-8/experimental group). All data are and presented as mean +/-  
14 SEM. \* p ≤ 0.05 and \*\* p ≤ 0.01.
-

## 1 **Discussion**

2 Sepsis-induced tissue and organ damage are severe clinical complications responsible for the  
3 high fatality rate in patients suffering from sepsis (1, 3). To this end, no therapeutic option exists  
4 that can successfully prevent organ failure in septic patients. We established and investigated a  
5 model of disease tolerance during sepsis, which enabled us to reveal the importance of B cells  
6 and neutrophils in mediating tissue tolerance in the context of severe infections. Building on the  
7 reported interplay between these two cell populations, our data suggest that B cells shape  
8 neutrophils' tissue damaging properties by modulation of neutrophil Cxcr4 signaling. Targeting  
9 Cxcr4 using a peptidic agonist protected mice from tissue damage during sepsis without affecting  
10 the bacterial load, indicating a Cxcr4-dependent disease tolerance mechanism.

11  
12 Cellular depletion strategies allowed us to distinguish the contribution of selected cell types to  
13 infection-associated tissue damage in sepsis and, in parallel, to study their involvement in tissue  
14 tolerance mechanisms. The depletion of neutrophils as well as the absence of B cells fully  
15 abrogated tissue damage during primary sepsis (i.e. without prior tolerance-induction by LPS  
16 exposure), pointing towards a common, deleterious axis of these two immune cell types. It is well  
17 established that protective neutrophil effector functions during infection can be accompanied by  
18 severe collateral damage due to their tissue damaging properties by releasing inflammatory  
19 mediators such as IL-1 $\beta$  (32) and reactive oxygen species (33), or via tissue-factor mediated  
20 activation of coagulation (34-36) and the release of neutrophil extracellular traps (NETs) (37, 38).  
21 Our data indicate, that neutrophils are the primary effector cells that drive tissue damage, while B  
22 cells impact tissue damage by modulating neutrophil effector functions. It was demonstrated  
23 earlier that mature, splenic B2 cells promote neutrophil activation and their subsequent tissue  
24 damaging properties by boosting type-I IFN dependent early inflammation during polymicrobial  
25 sepsis (13). In support of proinflammatory, tissue-damaging properties of mature B2 cell subsets,  
26 we found splenectomy similarly protective as B cell deficiency during primary sepsis and  
27 reconstitution of Rag2<sup>-/-</sup> mice with B cells to increase tissue damage. Interestingly, we did not  
28 identify an important role for the proposed IFNAR-driven inflammatory function of B cells (13) in  
29 sepsis, and inflammation did not differ between wild type and lymphocyte deficient mice. However,  
30 it seemed counterintuitive at first, that the absence of neutrophils or B cells, respectively,  
31 prevented tissue damage in a primary infection, while they at the same time seemed critical for  
32 tissue protection in a model of LPS-induced tolerance. We thus hypothesized that B1 and B1-like  
33 cells, in contrast to B2 cells, reduced neutrophil's tissue damaging effector functions. Using sIgM  
34 deficient mice, enabled us to rule out a major role for IgM in tissue tolerance during sepsis, even

1 though IgM was reported to exhibit anti-thrombotic functions in cardiovascular diseases (39) and  
2 high plasma IgM levels positively correlate with a better outcome in human sepsis (24) and mouse  
3 models (23). However, while sIgM deficiency did not prevent LPS-induced tolerance, naïve sIgM<sup>-/-</sup>  
4 mice developed less organ damage during primary sepsis as compared to control animals. As  
5 sIgM deficiency goes along with a decreased abundance of B2 and an increased abundance of  
6 B1 cells (40) this further supported the notion of tissue damaging B2, and tissue protective B1  
7 cells.

8  
9 Since we discovered that LPS-induced protection was still observed in splenectomized animals,  
10 we considered the possibility that B cells regulate infection-induced neutrophil functionalities via  
11 effects exerted by sharing the same bone marrow niche. In fact, B cells, neutrophils and their  
12 precursors build up the majority of the constitutive CD45<sup>+</sup> bone marrow cell pool, where they  
13 mature while sharing the same niche (25). Due to their potential tissue damaging properties,  
14 granulopoiesis and neutrophil trafficking is tightly controlled. Under steady state conditions in  
15 mice, only 2% of mature neutrophils circulate through the body, while the majority of cells is stored  
16 in the bone marrow from where they can be quickly released upon e.g. infection, to traffic to the  
17 periphery (30). Accumulating evidence highlights the substantial plasticity and functional  
18 heterogeneity of neutrophils, dependent on their localization (41), circadian rhythm (27) or  
19 maturation stage (31).

20  
21 It has been proposed earlier that neutrophils and B cells regulate each other in a reciprocal fashion  
22 in the bone marrow (42). Based on our finding of a long-lasting transcriptional reprogramming in  
23 the neutrophil compartment and B cell dependency of tolerance-associated Cxcr4 upregulation, it  
24 is tempting to speculate that B cells act as important regulators of granulopoiesis and neutrophil  
25 trafficking at steady state and under inflammatory conditions. Cxcr4 interaction with its ligand  
26 Cxcl12 (stromal cell-derived factor 1, SDF1) has been shown to be critical for neutrophil release  
27 to the periphery as well as their homing back to the bone marrow when they become senescent  
28 (28, 29). Importantly, Cxcr4 signaling is essential, as *Cxcr4* knockout mice die perinatally due to  
29 severe developmental defects ranging from virtually absent myelopoiesis and impaired B  
30 lymphopoiesis to abnormal brain development (43). Antagonizing SDF1/Cxcr4 signaling is  
31 approved for stem cell mobilization from the bone marrow and is under extensive research in  
32 oncology, as it is critical for tumor development, metastasis and tumor cell migration (44). More  
33 recently, Cxcr4 signaling was described to delay neutrophil aging and to protect from vascular  
34 damage in an ischemia reperfusion model (27), supporting our data showing the tissue protective

Gawish *et al.* 2022

- 1 effects of upregulated Cxcr4 on neutrophils in sepsis. Strikingly, activating, but not antagonizing,
- 2 Cxcr4 during sepsis induced tissue tolerance, suggesting that B cell driven regulation of Cxcr4 is
- 3 a potential mechanism of disease tolerance and thus might be an interesting therapeutic target
- 4 during severe sepsis.

## 1 Material and Methods

### 2 Reagents and resources

| KEY RESOURCE TABLE                                    |                             |                    |
|-------------------------------------------------------|-----------------------------|--------------------|
| REAGENT or                                            | SOURCE                      | Catalogue number   |
| Antibodies                                            |                             |                    |
| ultra-LEAF anti-mouse Ly-6G antibody                  | clone 1A8, Biolegend        | cat# 127650        |
| anti-mouse GPIIb $\alpha$ (CD42b)                     | polyclonal, Emfret          | cat# R300          |
| anti-mouse CD4 antibody                               | clone GK1.5                 | generated in-house |
| anti-mouse CD8 antibody                               | clone YTS169                | generated in-house |
| anti-mouse CD61 PE                                    | clone 2C9.G2, Biolegend     | cat# 104307        |
| anti-mouse CD45 BV510                                 | clone 30-F11, BioLegend     | cat# 103137        |
| anti-mouse Ter119 APC-Cy7                             | clone TER-119, BioLegend    | cat# 116223        |
| anti-mouse CD3e FITC                                  | clone 17A2, BioLegend       | cat# 100204        |
| anti-mouse CD19 FITC                                  | clone 6D5, BioLegend        | cat# 115506        |
| anti-mouse CD19 PE                                    | clone 6D5, BioLegend        | cat# 115507        |
| anti-mouse CD19 BV605                                 | clone 6D5, BioLegend        | cat# 115540        |
| anti-mouse IgD PE                                     | clone 11-26c, BioLegend     | cat# 12-5993       |
| anti-mouse IgM eFluor450                              | clone 48-5890, eBioscience  | cat# 48-5890       |
| anti-mouse CD23 FITC                                  | clone B3B4, BioLegend       | cat# 101606        |
| anti-mouse CD21/CD35 PerCP Cy5.5                      | clone 7E9, BioLegend        | cat# 123416        |
| anti-mouse CD43 APC                                   | clone S11, BioLegend        | cat# 143208        |
| anti-mouse Ly-6G PE                                   | clone 1A8, BioLegend        | cat# 127608        |
| anti-mouse Ly-6G PE-Cy7                               | clone 1A8, BioLegend        | cat# 127617        |
| anti-mouse Ly-6C BV605                                | clone 1A8, BioLegend        | cat# 127639        |
| anti-mouse CD11b AF700                                | clone M1/70, eBioscience    | cat# 56-0112-80    |
| anti-mouse CD62L PE                                   | clone MEL-14, BD Pharmingen | cat# 553151        |
| anti-mouse Cxcr4 APC                                  | clone L276F12, BioLegend    | cat# 146507        |
| anti-mouse NIMP-R14                                   | Abcam                       | cat# ab2557-50     |
| goat anti-rat biotinylated IgG                        | polyclonal, BioRad          | cat# STAR131B      |
| anti-mouse F4/80                                      | AbD Serotec                 | cat# MCA497G       |
| rabbit anti-rat biotinylated IgG                      | Vector Laboratories         | cat# BA-4001       |
| goat anti-mouse IgM ( $\mu$ -chain specific)          | Sigma-Aldrich               | cat# M8644         |
| purified mouse IgM, $\kappa$ isotype control antibody | Clone MM30, Biolegend       | cat# 401601        |

|                                                                   |                                                                                     |                    |
|-------------------------------------------------------------------|-------------------------------------------------------------------------------------|--------------------|
| goat anti-mouse IgM alkaline phosphatase ( $\mu$ -chain specific) | Sigma-Aldrich                                                                       | cat# A9688         |
| <b>Bacterial and Virus Strains</b>                                |                                                                                     |                    |
| <i>E. coli</i> O18:K1                                             | clinical isolate                                                                    | n.a.               |
| <b>Biological Samples</b>                                         |                                                                                     |                    |
| Lipopolysaccharide purified from <i>E. coli</i> O55:B5            | Sigma-Aldrich                                                                       | cat# L2880         |
| <b>Chemicals, Peptides, and Recombinant Proteins</b>              |                                                                                     |                    |
| Endotoxin-free PBS, pH 7.4                                        | Gibco                                                                               | cat# 11503387      |
| NaCl                                                              | Carl Roth                                                                           | cat# 0601.1        |
| EDTA                                                              | Sigma-Aldrich                                                                       | cat# E5134         |
| Tris                                                              | VWR Chemicals                                                                       | cat# 28808.294     |
| MgCl <sub>2</sub>                                                 | Sigma Aldrich                                                                       | cat# M8266         |
| CaCl <sub>2</sub>                                                 | Sigma Aldrich                                                                       | cat# C3306         |
| Triton X-100                                                      | Sigma-Aldrich                                                                       | cat# T9284         |
| NH <sub>4</sub> Cl                                                | Sigma-Aldrich                                                                       | cat# 09718         |
| KHCO <sub>3</sub>                                                 | Carl Roth                                                                           | cat# P748.1        |
| Na <sub>2</sub> EDTA                                              | Sigma-Aldrich                                                                       | cat# 324503        |
| Bovine serum albumin                                              | Sigma-Aldrich                                                                       | cat# A8806         |
| RLT Plus Buffer                                                   | Qiagen                                                                              | cat# 1053393       |
| $\beta$ -mercaptoethanol                                          | Sigma-Aldrich                                                                       | cat# M3148         |
| Formalin 7.5%                                                     | SAV LP GmbH                                                                         | cat# FN-60180-75-1 |
| Fixable Viability Dye eFluor780                                   | eBioscience                                                                         | cat# 65-0865       |
| Citrate based antigen unmasking solution                          | Vector laboratories                                                                 | cat# H3300         |
| Eosin Y Solution                                                  | Sigma-Aldrich                                                                       | cat# 318906        |
| Mayer's Hemalum solution                                          | Merck                                                                               | cat# 654833        |
| Clodronate loaded liposomes                                       | <a href="http://www.clodronateliposomes.org">http://www.clodronateliposomes.org</a> | cat# C-010         |
| Protease inhibitor cocktail                                       | Sigma-Aldrich                                                                       | cat# P8340         |
| RNase Inhibitor                                                   | Takara/Clontech                                                                     | cat# 2313A         |
| Protease Type XIV                                                 | Sigma-Aldrich                                                                       | cat# P5147         |
| Eukitt                                                            | Sigma-Aldrich                                                                       | cat# 03989         |
| Lumi Phos plus                                                    | Lumigen, Beckmann Coulter                                                           | cat# P-701         |
| <b>Critical Commercial Assays</b>                                 |                                                                                     |                    |
| Mouse IL-6 ELISA                                                  | BioLegend                                                                           | cat# 431301        |
| Mouse Cxcl1/KC DuoSet ELISA                                       | R&D Systems                                                                         | cat# DY453         |
| Mouse IL-1 $\beta$ ELISA                                          | BioLegend                                                                           | cat# 432601        |
| Mouse Ccl2/JE/MCP-1 DuoSet ELISA                                  | R&D Systems                                                                         | cat# DY479         |
| Avidin/Biotin Blocking kit                                        | Vector laboratories                                                                 | cat# SP-2001       |
| Vector ABC Tertiary                                               | Vector laboratories                                                                 | cat# PK-7100       |

|                                                  |                                                                                   |                                                                                               |
|--------------------------------------------------|-----------------------------------------------------------------------------------|-----------------------------------------------------------------------------------------------|
| DAB mix                                          | Vector laboratories                                                               | cat# SK-4100                                                                                  |
| RNeasy Plus micro kit                            | Gibco                                                                             | cat# 74034                                                                                    |
| iScript cDNA Synthesis Kit                       | BioRad                                                                            | cat# 170-8891                                                                                 |
| iTaq Universal SYBR Green Supermix               | BioRad                                                                            | cat# 172-5124                                                                                 |
| TECHNOTHROMBIN® TGA Assay                        | Technoclone                                                                       | cat#5006010                                                                                   |
| <b>Experimental Models: Organisms/Strains</b>    |                                                                                   |                                                                                               |
| WT (C57BL/6J)                                    | Charles River Laboratories or animal facility of the Medical University of Vienna | C57BL/6J, <a href="https://www.criver.com/">https://www.criver.com/</a>                       |
| <i>Nf-κb1</i> <sup>-/-</sup>                     | (45)                                                                              | <a href="https://www.jax.org/strain/002849">https://www.jax.org/strain/002849</a>             |
| <i>Rag2</i> <sup>-/-</sup>                       | (46)                                                                              | <a href="https://www.jax.org/strain/008449">https://www.jax.org/strain/008449</a>             |
| <i>J<sub>H</sub>T</i> <sup>-/-</sup>             | (47)                                                                              | <a href="https://www.jax.org/strain/002438">https://www.jax.org/strain/002438</a>             |
| <i>slgM</i> <sup>-/-</sup>                       | (48)                                                                              | <a href="https://www.jax.org/strain/003751">https://www.jax.org/strain/003751</a>             |
| <i>IFNAR</i> <sup>-/-</sup>                      | (49)                                                                              | <a href="https://www.jax.org/strain/010830">https://www.jax.org/strain/010830</a>             |
| UBC-GFP                                          | (50)                                                                              | <a href="https://www.jax.org/strain/004353">https://www.jax.org/strain/004353</a>             |
| <b>Oligonucleotides</b>                          |                                                                                   |                                                                                               |
| mouse <i>Cxcr4</i> fwd                           |                                                                                   | 5'-TGCAGCAGGTAGCAGTGAAA-3'                                                                    |
| mouse <i>Cxcr4</i> rev                           |                                                                                   | 5'-TGTATATACTCACACTGATCGGTCC-3'                                                               |
| mouse <i>Gapdh</i> fwd                           |                                                                                   | 5'-GGTCGTATTGGGCGCCTGGTCACC-3'                                                                |
| mouse <i>Gapdh</i> rev                           |                                                                                   | 5'-CACACCCATGACGAACATGGGGGC-3'                                                                |
| <b>Recombinant DNA</b>                           |                                                                                   |                                                                                               |
| <b>Software and Algorithms</b>                   |                                                                                   |                                                                                               |
| Bioconductor R package <i>Genomic alignments</i> | (51)                                                                              |                                                                                               |
| DSeq2                                            | (52)                                                                              |                                                                                               |
| GOrilla                                          | (53)                                                                              |                                                                                               |
| Prism 8 for macOS, version 8.3.1 (332) (2019)    | GraphPad Software, LLC.                                                           |                                                                                               |
| <i>ihw</i> R package                             | (54)                                                                              |                                                                                               |
| STAR aligner                                     | (55)                                                                              |                                                                                               |
| Trimmomatic                                      | (56)                                                                              |                                                                                               |
| <b>Other</b>                                     |                                                                                   |                                                                                               |
| Columbia agar plates + 5% sheep blood            | Biomerieux                                                                        | <a href="http://www.biomerieux-culturemedia.com/">http://www.biomerieux-culturemedia.com/</a> |



## 1 **Methods**

### 2 *Animal studies*

3 All experiments were performed using age-matched 8 to 12-week-old female mice. Wild type  
4 C57BL/6 mice were obtained from Charles River Laboratories or bred in the animal facility of the  
5 Medical University of Vienna. *Nf- $\kappa$ b1<sup>-/-</sup>* mice were kindly provided by Derek Mann (Newcastle  
6 University, UK). *Rag2<sup>-/-</sup>*, *J<sub>H</sub>T<sup>-/-</sup>*, *slgM<sup>-/-</sup>*, UBC-GFP, and *IFNAR1<sup>-/-</sup>* mice were bred in the animal  
7 facility of the Medical University of Vienna.

8 All *in vivo* experiments were performed after approval by the institutional review board of the  
9 Austrian Ministry of Sciences and the Medical University of Vienna (BMWF-66.009/0272-  
10 II/3b/2013 and BMWF-66.009/0032-V/3b/2019).

11

### 12 *Mouse model of tolerance to E. coli peritonitis*

13 Tolerance was induced by i.v. injection of 30 $\mu$ g *E. coli* LPS (Sigma-Aldrich) at indicated times  
14 before intraperitoneal (i.p.) infection with 1-2x10<sup>4</sup> *E. coli* O18:K1. *E. coli* peritonitis was induced as  
15 described previously (57-59). Mice were humanely killed at indicated time points and blood,  
16 peritoneal lavage fluid (PLF) and organs were collected for further analysis. Peritoneal cell  
17 numbers were determined with a hemocytometer, and cytospin preparations were stained with  
18 Giemsa for differential cell counts and/or flow cytometry. Organs were stored in 7.5% formalin for  
19 histology or homogenized using Precellys 24 (Peqlab Biotechnologie GmbH) and prepared for  
20 further analysis as described earlier in detail (60). For ELISA, lysates were incubated in  
21 Greenberger lysis buffer (300mMol NaCl, 30mMol Tris, 2mMol MgCl<sub>2</sub>, 2mMol CaCl<sub>2</sub>, 1% Triton X-  
22 100, 2% protease Inhibitor cocktail) (61), and supernatants were stored at -20°C. For RNA  
23 isolation, lysates were stored in RLT buffer (Qiagen, containing 1%  $\beta$ -mercaptoethanol) at -80°C.  
24 Pathogen burden was evaluated in organ homogenates by plating serial dilutions on blood agar  
25 plates (Biomerieux), as previously described (57). Blood platelet counts were determined in freshly  
26 isolated anticoagulated EDTA blood using a VetABC differential blood cell counter. Liver  
27 transaminase levels (ASAT, ALAT) were quantified in the plasma using a Cobas c311 analyzer  
28 (Roche). IL-1, IL-6, TNF, CCL2 and CXCL1 were quantified using commercial ELISA kits  
29 according to manufacturers' instructions. IgM levels were detected by coating plates with an anti-  
30 mouse IgM capture antibody (Sigma-Aldrich), followed by blocking with 1% BSA in PBS  
31 (containing 0,27mM EDTA) and incubation with plasma samples and standard dilutions of control  
32 mouse IgM (BioLegend). After several washing steps with PBS/EDTA, plates were incubated with  
33 an alkaline phosphatase-conjugated goat anti-mouse IgM (Sigma), washed with TBS (pH 7,4) and  
34 chemiluminescence was developed using Lumi Phos Plus (Lumigen) reagent.

## 1 *Cell depletions*

2 Neutrophil or platelet depletion was achieved by i.v. injection of depletion antibodies 36h prior  
3 induction of *E. coli* peritonitis. Neutrophils were targeted using ultra-LEAF anti Ly-6G antibody  
4 (1mg/mouse, Biolegend) and platelets by injection of anti GPIb $\alpha$  (CD42b, 40 $\mu$ g/mouse) (Emfret).  
5 CD4<sup>+</sup> and CD8<sup>+</sup> T cell depletion was performed by i.v. administration of anti CD4 (200 $\mu$ g/mouse)  
6 or anti CD8 (400 $\mu$ g/mouse) antibodies 36h prior LPS treatment and repeated every three days  
7 until sepsis was induced by *E. coli* injection. Monocytes and macrophages were depleted by single  
8 i.v. administration of Clodronate loaded liposomes. Depletion of platelets, T- and B cells was  
9 verified by flow-cytometry. Neutrophil depletion was confirmed by differential cell counts of Giemsa  
10 stained PLF cytopins and macrophage depletion by immunohistochemistry for F4/80<sup>+</sup> cells on  
11 formalin fixed liver sections.

12

## 13 *Cell transfers and splenectomy*

14 Splenocytes were isolated from naïve WT C57BL/6 mice and i.v. injected into Rag2 deficient mice  
15 (1 x 10<sup>7</sup> cells/mouse) after erythrocyte lysis using ACK lysis buffer (150mM NH<sub>4</sub>Cl, 10mM KHCO<sub>3</sub>,  
16 0.1mM Na<sub>2</sub>EDTA, pH 7.2 – 7.4). Four days later, transplanted animals were pretreated with NaCl  
17 or LPS and two weeks later, challenged with *E. coli* as described above. Resting B cells were  
18 isolated from spleens of naïve UBC-GFP mice using magnetic beads (Milteny Biotec, Mouse B  
19 cell isolation kit) and i.v. injected into Rag2 deficient mice (5 x 10<sup>6</sup> cells/mouse) after erythrocyte  
20 lysis (ACK lysis buffer) two weeks and four days prior to LPS/NaCl treatment. After pretreatment  
21 with NaCl or LPS transplanted animals were challenged with *E. coli* as described above. Mice  
22 were splenectomized or sham operated as described previously (62) and after 1 week recovery,  
23 treated with NaCl/LPS and challenged with *E. coli* as described above.

## 24 *In vitro thrombin-generation assay*

25 Thrombin generation was assayed according to the manufacturer's instruction (Technoclone).  
26 Briefly, citrated platelet poor plasma was thawed and shortly vortexed, diluted 1:2 with PBS and  
27 transferred onto a black NUNC Maxisorp plate. Fluorogenic thrombin generation substrate  
28 containing 15mM CaCl<sub>2</sub> was added and the plate immediately read for 60min with  
29 Excitation/Emission at 360nm/460nm. Values were automatically calculated by the provided  
30 software.

31

## 32 *Flow cytometry*

33 Splenocytes were isolated by passaging spleens through 70 $\mu$ m cell strainers and after erythrocyte  
34 lysis, single-cell suspensions were obtained. Bone marrow cells were obtained by flushing femurs,

1 followed by filtering through 70µm cell strainers. Cells were counted using a CASY cell counter  
2 and after unspecific binding was blocked using mouse IgG (Invitrogen), cells were stained in PBS  
3 containing 2% FCS using antibodies (see table) against mouse CD45, CD3, CD19, CD23, IgM,  
4 CD21, CD43, CD11b and Ly-6G. This was followed by incubation with a Fixable Viability Dye  
5 eFluor 780 (eBioscience) according to the manufacturer's instructions to determine cell viability.  
6 After several washing steps, cells were fixed (An der Grub Fix A reagent) and analyzed via flow  
7 cytometry using a BD LSRFortessa™ X-20 cell analyzer.

8

### 9 *Cell sorting, RNA sequencing and RT-PCR*

10 For RNA sequencing, 200 neutrophils (defined as single/live/CD45<sup>+</sup>/CD3<sup>-</sup>/CD19<sup>-</sup>/Ly6G<sup>+</sup>/Ly-6C<sup>int+</sup>)  
11 were sorted from mouse bone marrow single cell suspensions (prepared as indicated above) into  
12 4µL cell lysis buffer containing nuclease-free H<sub>2</sub>O with 0.2% Triton X-100 (Sigma-Aldrich) and 2  
13 U/µl RNase Inhibitor (Takara/Clontech) using a FACSAria Fusion cytometer. Cell lysates were  
14 stored at -80°C. Library preparation was performed according to the Smart-Seq2 protocol (63),  
15 followed by sequencing of pooled libraries on the Illumina HiSeq 2000/2500 (50 bp single-read  
16 setup) at the Biomedical Sequencing Facility of the Medical University of Vienna and CeMM. For  
17 analysis, reads were adapter-trimmed (Trimmomatic) (56) and aligned to the *mm10* reference  
18 genome (*STAR aligner*) (55). Counting of reads mapping to genes was performed using the  
19 *summarizeOverlaps* function (*Bioconductor* R package *GenomicAlignments*) (51). Differentially  
20 expressed genes were identified using *DESeq2* (52), whereby separate models per organ and  
21 condition (bone marrow or blood, respectively, +/- LPS or NaCl, respectively treatment) were  
22 formulated for all pairwise comparisons. Filtering was performed by independent hypothesis  
23 weighting (*ihw* R package) (54). Gene ontology (GO) enrichment analysis of neutrophil DEGs was  
24 performed using the GOrilla (Gene ontology enrichment analysis and visualization tool).

25 For verification of *Cxcr4* upregulation, 1.5x10<sup>5</sup> neutrophils were sorted as described above into  
26 cold PBS containing 2% BSA, followed by centrifugation and resuspension of the pellet in 350µl  
27 RLT Buffer containing 1% (v/v) β-mercaptoethanol. RNA isolation was performed using RNeasy  
28 Plus micro kit (Qiagen) according to the manufacturer's instructions. Reverse transcription was  
29 performed using 150ng of isolated RNA and the iScript cDNA Synthesis Kit (Biorad), according to  
30 manufacturer's instructions. Real-time PCR for mouse *Cxcr4* was performed with iTaq Universal  
31 SYBR Green Supermix reagents (Applied Biosystems) on a StepOnePlus Real-Time PCR System  
32 (Applied Biosystems) using *Gapdh* as a housekeeper.

33

34

## 1 *Histology*

2 Liver sections (4  $\mu$ m) were stained with H&E and analyzed by a trained pathologist in a blinded  
3 fashion according to a scoring scheme, involving necrosis, sinusoidal- and lobular inflammation,  
4 steatosis and endothelial inflammation (0 representing absent, 1 mild, 2 moderate, and 3 severe).  
5 The sum of all parameters indicated the total histology score. After staining for fresh fibrin (MSB  
6 stain, performed at the routine laboratory at Newcastle University), samples were scored for the  
7 presence of microthrombi by a trained pathologist in a blinded fashion. NIMPR1 immunostaining  
8 was performed on paraffin-embedded liver sections as described earlier (64). Briefly, antigen  
9 retrieval was achieved using a citrate-based buffer at pH 6.0 (Vector laboratories), followed by  
10 several blocking steps. Incubation with anti-NIMP-R14 antibody (Abcam) was performed at 4°C,  
11 over-night followed by 2h exposure to a biotinylated secondary goat anti-rat antibody  
12 (Serotec/Biorad). For F4/80 staining, antigen retrieval was achieved by protease type XIV (Sigma)  
13 digestion at 37°C for 20min, followed by several washings and blocking steps. After 1h incubation  
14 with an anti-F4/80 antibody (Serotec), exposure to a biotinylated secondary rabbit anti-rat antibody  
15 was performed at room temperature. Finally, both stains were incubated with VECTASTAIN Elite  
16 ABC Reagent and visualized using diaminobenzidine peroxidase substrate (Vector Laboratories),  
17 followed by counterstaining with hematoxylin and embedding (Eukitt, Sigma).

## 18 19 *Statistical analysis*

20 Statistical evaluation was performed using GraphPad Prism software except for statistical analysis  
21 of RNA sequencing data, which was performed using R. Data are represented as mean  $\pm$  SEM  
22 and were analyzed using either Student's t-test, comparing two groups, or one-way ANOVA  
23 analysis, followed by Tukey multiple comparison test, for more than two groups. Differences with  
24 a p-value  $\leq$  0.05 were considered significant. For DEG, genes with an FDR-adjusted p value of <  
25 0.1 were considered differentially expressed.

1 **Author contributions**

2 RG performed experiments, analyzed data and wrote the manuscript. BM and GO performed  
3 experiments and analyzed data. MLW, A-DG, AF, FQ, KL, AH, AK and AA helped with  
4 experimental procedures. IM, FOb and JGB performed pathological scorings. LB provided crucial  
5 reagents. FOa, IL and CJB contributed to the design of the study. SK conceived and supervised  
6 the project and wrote the manuscript.

7

8 **Acknowledgements**

9 The authors thank Henriette Luise Horstmeier and Aysu Eshref for help with experimental  
10 procedures, Sophie Zahalka for help with illustrations and the animal caretakers at the Center for  
11 Biomedical Research, Medical University Vienna, for their expert work. We acknowledge the core  
12 facilities of the Medical University of Vienna, including the Flow Cytometry Facility and the  
13 Biomedical Sequencing Facility (BSF, jointly run with CeMM). This work was funded by the  
14 Austrian Science Fund (FWF) within the Doctoral Program Cell Communication in Health and  
15 Disease (CCHD, 1205FW), and the Special Research Projects Immunothrombosis (SFB 054-10)  
16 and Chromatin Landscapes (SFB 061-04) to S.K. FO is supported by MRC program Grants;  
17 MR/K0019494/1 and MR/R023026/1.

18

19 **Declaration of interests**

20 The authors declare no financial or commercial conflict of interest.

## 1 **References**

- 2 1. Mayr FB, Yende S, Angus DC. Epidemiology of severe sepsis. *Virulence*. 2014;5(1):4-11.
- 3 2. Holzheimer RG, Muhrer KH, L'Allemand N, Schmidt T, Henneking K. Intraabdominal infections:  
4 classification, mortality, scoring and pathophysiology. *Infection*. 1991;19(6):447-52.
- 5 3. Singer M, Deutschman CS, Seymour CW, Shankar-Hari M, Annane D, Bauer M, et al. The Third  
6 International Consensus Definitions for Sepsis and Septic Shock (Sepsis-3). *JAMA*.  
7 2016;315(8):801-10.
- 8 4. Semeraro N, Ammollo CT, Semeraro F, Colucci M. Coagulopathy of Acute Sepsis. *Semin Thromb  
9 Hemost*. 2015;41(6):650-8.
- 10 5. Gando S, Levi M, Toh CH. Disseminated intravascular coagulation. *Nat Rev Dis Primers*.  
11 2016;2:16037.
- 12 6. Angus DC, van der Poll T. Severe sepsis and septic shock. *N Engl J Med*. 2013;369(21):2063.
- 13 7. Levy MM, Fink MP, Marshall JC, Abraham E, Angus D, Cook D, et al. 2001  
14 SCCM/ESICM/ACCP/ATS/SIS International Sepsis Definitions Conference. *Crit Care Med*.  
15 2003;31(4):1250-6.
- 16 8. Kotas ME, Medzhitov R. Homeostasis, inflammation, and disease susceptibility. *Cell*.  
17 2015;160(5):816-27.
- 18 9. Medzhitov R, Schneider DS, Soares MP. Disease tolerance as a defense strategy. *Science*.  
19 2012;335(6071):936-41.
- 20 10. Martins R, Carlos AR, Braza F, Thompson JA, Bastos-Amador P, Ramos S, et al. Disease  
21 Tolerance as an Inherent Component of Immunity. *Annu Rev Immunol*. 2019.
- 22 11. Asakura H, Suga Y, Yoshida T, Ontachi Y, Mizutani T, Kato M, et al. Pathophysiology of  
23 disseminated intravascular coagulation (DIC) progresses at a different rate in tissue factor-induced  
24 and lipopolysaccharide-induced DIC models in rats. *Blood Coagul Fibrinolysis*. 2003;14(3):221-8.
- 25 12. Ohtaki Y, Shimauchi H, Yokochi T, Takada H, Endo Y. In vivo platelet response to  
26 lipopolysaccharide in mice: proposed method for evaluating new antiplatelet drugs. *Thromb Res*.  
27 2002;108(5-6):303-9.
- 28 13. Kelly-Scumpia KM, Scumpia PO, Weinstein JS, Delano MJ, Cuenca AG, Nacionales DC, et al. B  
29 cells enhance early innate immune responses during bacterial sepsis. *J Exp Med*.  
30 2011;208(8):1673-82.
- 31 14. Rajarathnam K, Schnoor M, Richardson RM, Rajagopal S. How do chemokines navigate  
32 neutrophils to the target site: Dissecting the structural mechanisms and signaling pathways. *Cell  
33 Signal*. 2019;54:69-80.
- 34 15. Bianconi V, Sahebkar A, Atkin SL, Pirro M. The regulation and importance of monocyte  
35 chemoattractant protein-1. *Curr Opin Hematol*. 2018;25(1):44-51.
- 36 16. Fan H, Cook JA. Molecular mechanisms of endotoxin tolerance. *J Endotoxin Res*. 2004;10(2):71-  
37 84.
- 38 17. Ziegler-Heitbrock L. The p50-homodimer mechanism in tolerance to LPS. *J Endotoxin Res*.  
39 2001;7(3):219-22.



- 1 18. Rauch PJ, Chudnovskiy A, Robbins CS, Weber GF, Etzrodt M, Hilgendorf I, et al. Innate response  
2 activator B cells protect against microbial sepsis. *Science*. 2012;335(6068):597-601.
- 3 19. Weber GF, Chousterman BG, Hilgendorf I, Robbins CS, Theurl I, Gerhardt LM, et al. Pleural innate  
4 response activator B cells protect against pneumonia via a GM-CSF-IgM axis. *J Exp Med*.  
5 2014;211(6):1243-56.
- 6 20. Ha SA, Tsuji M, Suzuki K, Meek B, Yasuda N, Kaisho T, et al. Regulation of B1 cell migration by  
7 signals through Toll-like receptors. *J Exp Med*. 2006;203(11):2541-50.
- 8 21. Murakami M, Tsubata T, Shinkura R, Nisitani S, Okamoto M, Yoshioka H, et al. Oral administration  
9 of lipopolysaccharides activates B-1 cells in the peritoneal cavity and lamina propria of the gut and  
10 induces autoimmune symptoms in an autoantibody transgenic mouse. *J Exp Med*.  
11 1994;180(1):111-21.
- 12 22. Baumgarth N. B-1 Cell Heterogeneity and the Regulation of Natural and Antigen-Induced IgM  
13 Production. *Front Immunol*. 2016;7:324.
- 14 23. Marquez-Velasco R, Masso F, Hernandez-Pando R, Montano LF, Springall R, Amezcua-Guerra  
15 LM, et al. LPS pretreatment by the oral route protects against sepsis induced by cecal ligation and  
16 puncture. Regulation of proinflammatory response and IgM anti-LPS antibody production as  
17 associated mechanisms. *Inflamm Res*. 2007;56(9):385-90.
- 18 24. Krautz C, Maier SL, Brunner M, Langheinrich M, Giamarellos-Bourboulis EJ, Gogos C, et al.  
19 Reduced circulating B cells and plasma IgM levels are associated with decreased survival in sepsis  
20 - A meta-analysis. *J Crit Care*. 2018;45:71-5.
- 21 25. Yang M, Busche G, Ganzer A, Li Z. Morphology and quantitative composition of hematopoietic cells  
22 in murine bone marrow and spleen of healthy subjects. *Ann Hematol*. 2013;92(5):587-94.
- 23 26. Ivetic A. A head-to-tail view of L-selectin and its impact on neutrophil behaviour. *Cell Tissue Res*.  
24 2018;371(3):437-53.
- 25 27. Adrover JM, Del Fresno C, Crainiciuc G, Cuartero MI, Casanova-Acebes M, Weiss LA, et al. A  
26 Neutrophil Timer Coordinates Immune Defense and Vascular Protection. *Immunity*.  
27 2019;50(2):390-402 e10.
- 28 28. Eash KJ, Greenbaum AM, Gopalan PK, Link DC. CXCR2 and CXCR4 antagonistically regulate  
29 neutrophil trafficking from murine bone marrow. *J Clin Invest*. 2010;120(7):2423-31.
- 30 29. Martin C, Burdon PC, Bridger G, Gutierrez-Ramos JC, Williams TJ, Rankin SM. Chemokines acting  
31 via CXCR2 and CXCR4 control the release of neutrophils from the bone marrow and their return  
32 following senescence. *Immunity*. 2003;19(4):583-93.
- 33 30. Semerad CL, Liu F, Gregory AD, Stumpf K, Link DC. G-CSF is an essential regulator of neutrophil  
34 trafficking from the bone marrow to the blood. *Immunity*. 2002;17(4):413-23.
- 35 31. Evrard M, Kwok IWH, Chong SZ, Teng KWW, Becht E, Chen J, et al. Developmental Analysis of  
36 Bone Marrow Neutrophils Reveals Populations Specialized in Expansion, Trafficking, and Effector  
37 Functions. *Immunity*. 2018;48(2):364-79 e8.
- 38 32. Liu L, Sun B. Neutrophil pyroptosis: new perspectives on sepsis. *Cell Mol Life Sci*.  
39 2019;76(11):2031-42.



- 1 33. Kolaczowska E, Kubes P. Neutrophil recruitment and function in health and inflammation. *Nat Rev*  
2 *Immunol.* 2013;13(3):159-75.
- 3 34. Maugeri N, Manfredi AA. Tissue Factor Expressed by Neutrophils: Another Piece in the Vascular  
4 Inflammation Puzzle. *Semin Thromb Hemost.* 2015;41(7):728-36.
- 5 35. Osterud B. Tissue factor expression in blood cells. *Thromb Res.* 2010;125 Suppl 1:S31-4.
- 6 36. Pawlinski R, Mackman N. Cellular sources of tissue factor in endotoxemia and sepsis. *Thromb Res.*  
7 2010;125 Suppl 1:S70-3.
- 8 37. Kimball AS, Obi AT, Diaz JA, Henke PK. The Emerging Role of NETs in Venous Thrombosis and  
9 Immunothrombosis. *Front Immunol.* 2016;7:236.
- 10 38. Yipp BG, Kubes P. NETosis: how vital is it? *Blood.* 2013;122(16):2784-94.
- 11 39. Binder CJ, Papac-Milicevic N, Witztum JL. Innate sensing of oxidation-specific epitopes in health  
12 and disease. *Nat Rev Immunol.* 2016;16(8):485-97.
- 13 40. Tsiantoulas D, Kiss M, Bartolini-Gritti B, Bergthaler A, Mallat Z, Jumaa H, et al. Secreted IgM  
14 deficiency leads to increased BCR signaling that results in abnormal splenic B cell development.  
15 *Sci Rep.* 2017;7(1):3540.
- 16 41. Deniset JF, Surewaard BG, Lee WY, Kubes P. Splenic Ly6G(high) mature and Ly6G(int) immature  
17 neutrophils contribute to eradication of *S. pneumoniae*. *J Exp Med.* 2017;214(5):1333-50.
- 18 42. Ueda Y, Kondo M, Kelsoe G. Inflammation and the reciprocal production of granulocytes and  
19 lymphocytes in bone marrow. *J Exp Med.* 2005;201(11):1771-80.
- 20 43. Ma Q, Jones D, Borghesani PR, Segal RA, Nagasawa T, Kishimoto T, et al. Impaired B-  
21 lymphopoiesis, myelopoiesis, and derailed cerebellar neuron migration in CXCR4- and SDF-1-  
22 deficient mice. *Proc Natl Acad Sci U S A.* 1998;95(16):9448-53.
- 23 44. Eckert F, Schilbach K, Klumpp L, Bardoscia L, Sezgin EC, Schwab M, et al. Potential Role of  
24 CXCR4 Targeting in the Context of Radiotherapy and Immunotherapy of Cancer. *Front Immunol.*  
25 2018;9:3018.
- 26 45. Sha WC, Liou HC, Tuomanen EI, Baltimore D. Targeted disruption of the p50 subunit of NF-kappa  
27 B leads to multifocal defects in immune responses. *Cell.* 1995;80(2):321-30.
- 28 46. Hao Z, Rajewsky K. Homeostasis of peripheral B cells in the absence of B cell influx from the bone  
29 marrow. *J Exp Med.* 2001;194(8):1151-64.
- 30 47. Gu H, Zou YR, Rajewsky K. Independent control of immunoglobulin switch recombination at  
31 individual switch regions evidenced through Cre-loxP-mediated gene targeting. *Cell.*  
32 1993;73(6):1155-64.
- 33 48. Boes M, Esau C, Fischer MB, Schmidt T, Carroll M, Chen J. Enhanced B-1 cell development, but  
34 impaired IgG antibody responses in mice deficient in secreted IgM. *J Immunol.* 1998;160(10):4776-  
35 87.
- 36 49. Muller U, Steinhoff U, Reis LF, Hemmi S, Pavlovic J, Zinkernagel RM, et al. Functional role of type  
37 I and type II interferons in antiviral defense. *Science.* 1994;264(5167):1918-21.

- 1 50. Schaefer BC, Schaefer ML, Kappler JW, Marrack P, Kedl RM. Observation of antigen-dependent  
2 CD8+ T-cell/ dendritic cell interactions in vivo. *Cell Immunol.* 2001;214(2):110-22.
- 3 51. Lawrence M, Huber W, Pages H, Aboyoun P, Carlson M, Gentleman R, et al. Software for  
4 computing and annotating genomic ranges. *PLoS Comput Biol.* 2013;9(8):e1003118.
- 5 52. Love MI, Huber W, Anders S. Moderated estimation of fold change and dispersion for RNA-seq  
6 data with DESeq2. *Genome Biol.* 2014;15(12):550.
- 7 53. Eden E, Navon R, Steinfeld I, Lipson D, Yakhini Z. GOrilla: a tool for discovery and visualization of  
8 enriched GO terms in ranked gene lists. *BMC Bioinformatics.* 2009;10:48.
- 9 54. Ignatiadis N, Klaus B, Zaugg JB, Huber W. Data-driven hypothesis weighting increases detection  
10 power in genome-scale multiple testing. *Nat Methods.* 2016;13(7):577-80.
- 11 55. Dobin A, Davis CA, Schlesinger F, Drenkow J, Zaleski C, Jha S, et al. STAR: ultrafast universal  
12 RNA-seq aligner. *Bioinformatics.* 2013;29(1):15-21.
- 13 56. Bolger AM, Lohse M, Usadel B. Trimmomatic: a flexible trimmer for Illumina sequence data.  
14 *Bioinformatics.* 2014;30(15):2114-20.
- 15 57. Gawish R, Martins R, Bohm B, Wimberger T, Sharif O, Lakovits K, et al. Triggering receptor  
16 expressed on myeloid cells-2 fine-tunes inflammatory responses in murine Gram-negative sepsis.  
17 *FASEB J.* 2015;29(4):1247-57.
- 18 58. Knapp S, Matt U, Leitinger N, van der Poll T. Oxidized phospholipids inhibit phagocytosis and impair  
19 outcome in gram-negative sepsis in vivo. *Journal of immunology (Baltimore, Md : 1950).*  
20 2007;178(2):993-1001.
- 21 59. Knapp S, de Vos AF, Florquin S, Golenbock DT, van der Poll T. Lipopolysaccharide binding protein  
22 is an essential component of the innate immune response to *Escherichia coli* peritonitis in mice.  
23 *Infect Immun.* 2003;71(12):6747-53.
- 24 60. Sharif O, Matt U, Saluzzo S, Lakovits K, Haslinger I, Furtner T, et al. The scavenger receptor CD36  
25 downmodulates the early inflammatory response while enhancing bacterial phagocytosis during  
26 pneumococcal pneumonia. *Journal of immunology (Baltimore, Md : 1950).* 2013;190(11):5640-8.
- 27 61. Knapp S, Hareng L, Rijneveld AW, Bresser P, van der Zee JS, Florquin S, et al. Activation of  
28 neutrophils and inhibition of the proinflammatory cytokine response by endogenous granulocyte  
29 colony-stimulating factor in murine pneumococcal pneumonia. *J Infect Dis.* 2004;189(8):1506-15.
- 30 62. Frey MK, Alias S, Winter MP, Redwan B, Stubiger G, Panzenboeck A, et al. Splenectomy is  
31 modifying the vascular remodeling of thrombosis. *J Am Heart Assoc.* 2014;3(1):e000772.
- 32 63. Picelli S, Faridani OR, Bjorklund AK, Winberg G, Sagasser S, Sandberg R. Full-length RNA-seq  
33 from single cells using Smart-seq2. *Nat Protoc.* 2014;9(1):171-81.
- 34 64. Gieling RG, Elsharkawy AM, Caamano JH, Cowie DE, Wright MC, Ebrahimkhani MR, et al. The c-  
35 Rel subunit of nuclear factor-kappaB regulates murine liver inflammation, wound-healing, and  
36 hepatocyte proliferation. *Hepatology.* 2010;51(3):922-31.

1 **Table legends**

2 *Table 1: DEG of blood neutrophils isolated from mice 2 weeks post NaCl or LPS treatment*

3 *Table 2: DEG of bone marrow neutrophils isolated from mice 2 weeks post NaCl or LPS treatment*

## 1 Supplemental Figures

Supp. Figure 1

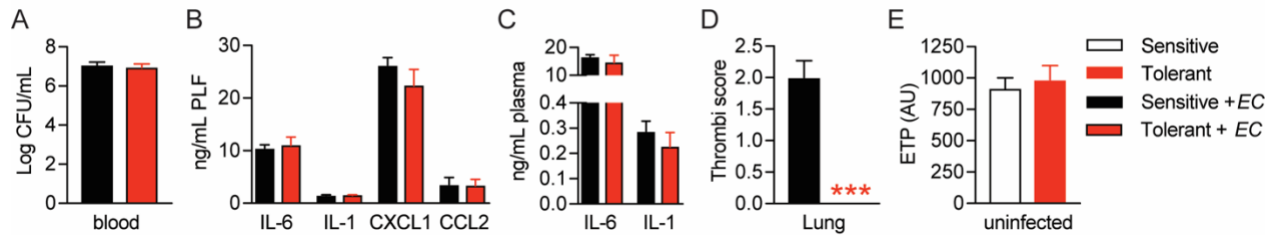

2

3 *Supplementary Figure 1:*

4 (A) Blood *E. coli* CFUs 18h p.i. with *E. coli* of mice, pretreated with LPS or NaCl 2 weeks before  
5 infection.

6 (B-C) PLF and plasma cytokine and chemokine levels 18h. p.i. with *E. coli*.

7 (D) Histopathological scoring of lung microthrombi 18h p.i. with *E. coli*.

8 (E) Endogenous thrombin potential (ETP) of plasma samples from uninfected mice 2 weeks after  
9 LPS or NaCl pretreatment.

10 Data depicted in (D) represent a single experiment (n = 8/group). All other data are representative  
11 for two or more independent experiments (n = 5-8/experimental group) and are presented as  
12 mean +/- SEM. \*\*\* p ≤ 0.001.

13

Supp. Figure 2

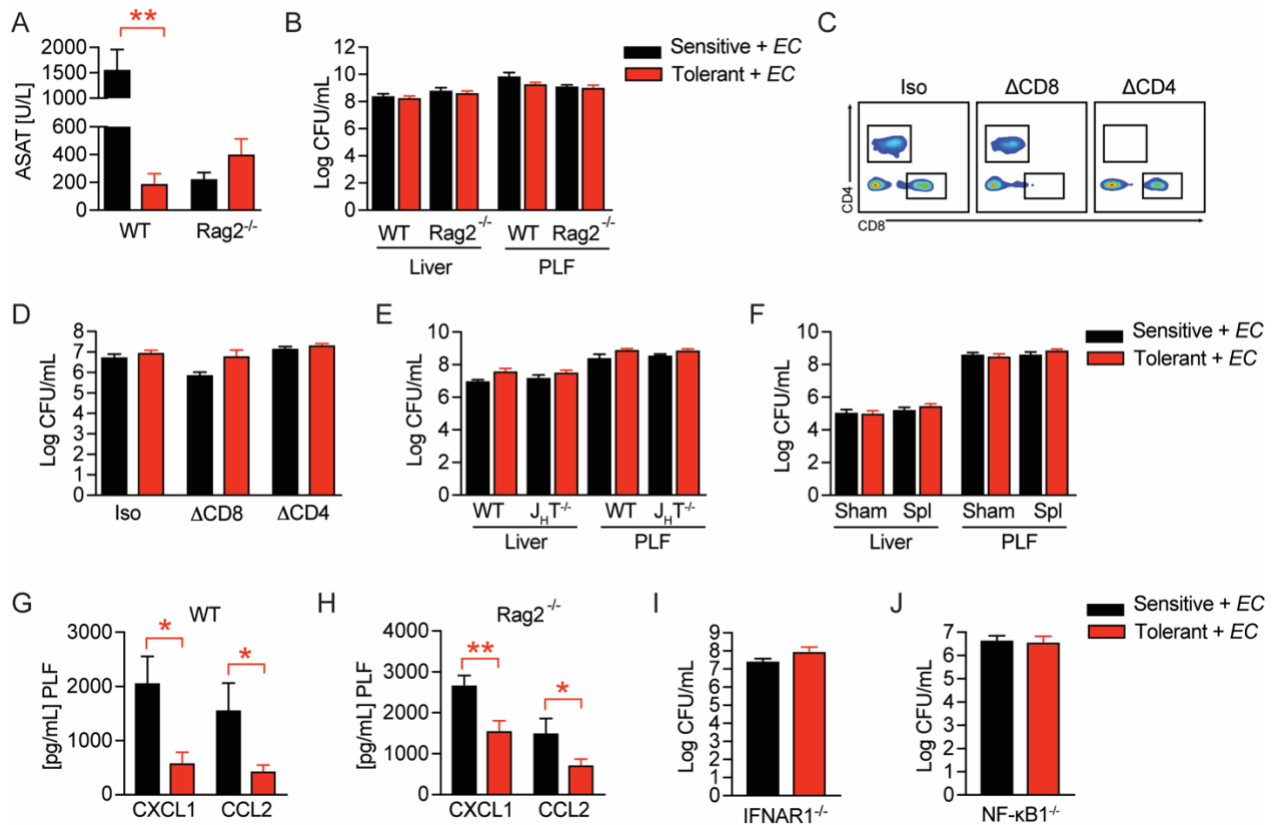

- 1
- 2 *Supplementary Figure 2:*
- 3 (A) ASAT plasma levels 18h p.i. with *E. coli* of NaCl or LPS pretreated WT and Rag2<sup>-/-</sup> mice.
- 4 (B) *E. coli* CFUs in livers and PLF of NaCl or LPS pretreated WT and Rag2<sup>-/-</sup> mice 18h p.i. with *E.*
- 5 *coli*.
- 6 (C) Flow-cytometric analysis of CD4<sup>+</sup> and CD8<sup>+</sup> T cells in blood of mice after administration of anti-
- 7 CD8, or anti-CD4, respectively, cell depletion antibodies.
- 8 (D) *E. coli* CFUs in livers 18h p.i. with *E. coli* of mice, which received CD4<sup>+</sup> or CD8<sup>+</sup> T cell depleting
- 9 antibodies before LPS or NaCl pretreatment.
- 10 (E) *E. coli* CFUs in livers and PLF of NaCl or LPS pretreated WT and J<sub>H</sub>T<sup>-/-</sup> mice at 18h p.i. with
- 11 *E. coli*.
- 12 (F) *E. coli* CFUs in livers and PLF 18h p.i. of mice, which were splenectomized or sham operated
- 13 1 week before LPS or NaCl pre-exposure (i.e. 3 weeks before bacterial infection).
- 14 (G-H) CXCL1 and CCL2 levels in PLF of NaCl or LPS pretreated wildtype (I) or Rag2<sup>-/-</sup> (J) mice
- 15 6h p.i. with *E. coli*.
- 16 (I) *E. coli* CFUs in livers of NaCl or LPS pretreated IFNAR1<sup>-/-</sup> mice 18h p.i. with *E. coli*.
- 17 (J) *E. coli* CFUs in livers of NaCl or LPS pretreated NF-κB1<sup>-/-</sup> mice 18h p.i. with *E. coli*.

Gawish *et al.* 2022

- 1 Data in (A-B) and (E-I) are representative out of 2-3 experiments (n = 4-8/experimental group).
- 2 Data depicted in (C-D) are from a single experiment (n = 6-8/group). Data in (J) are pooled from 2
- 3 experiments (n = 2-6/experimental group) and all data are presented as mean +/- SEM. \* p ≤ 0.05
- 4 and \*\* p ≤ 0.01.
- 5

Supp. Figure 3

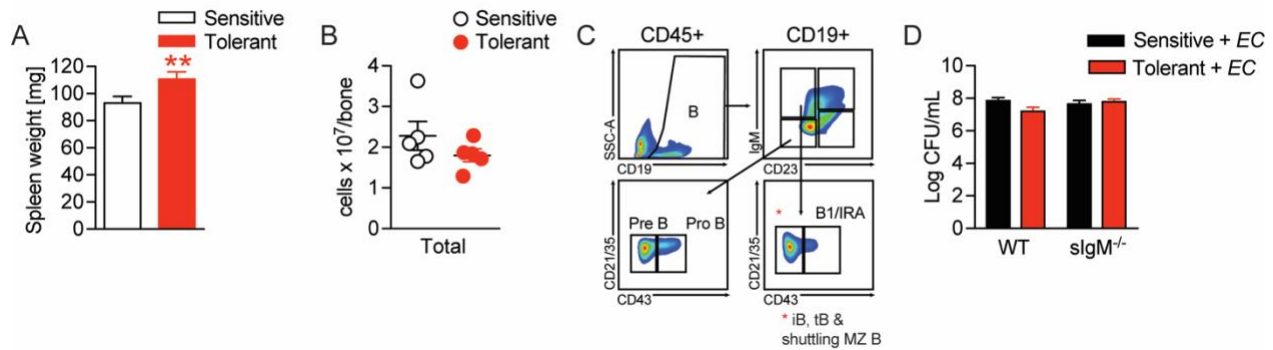

- 1
- 2 **Supplementary Figure 3:**
- 3 **(A)** Spleen weight of mice, which were treated with NaCl or LPS 2 weeks earlier.
- 4 **(B)** Nucleated cells per femur of mice treated with NaCl or LPS 2 weeks earlier.
- 5 **(C)** Gating strategy for bone marrow B cell subsets.
- 6 **(D)** *E. coli* CFUs in livers of NaCl or LPS pretreated WT and slgM<sup>-/-</sup> mice 18h p.i. with *E. coli*.
- 7 Data in (B) and (D) are representative out of 2-3 experiments (n = 4-8/experimental group). Data
- 8 in (A) are pooled from 3 experiments (n = 2-6/experimental group) and all data are presented as
- 9 mean +/- SEM. \*\* p ≤ 0.01.



Supp. Figure 4

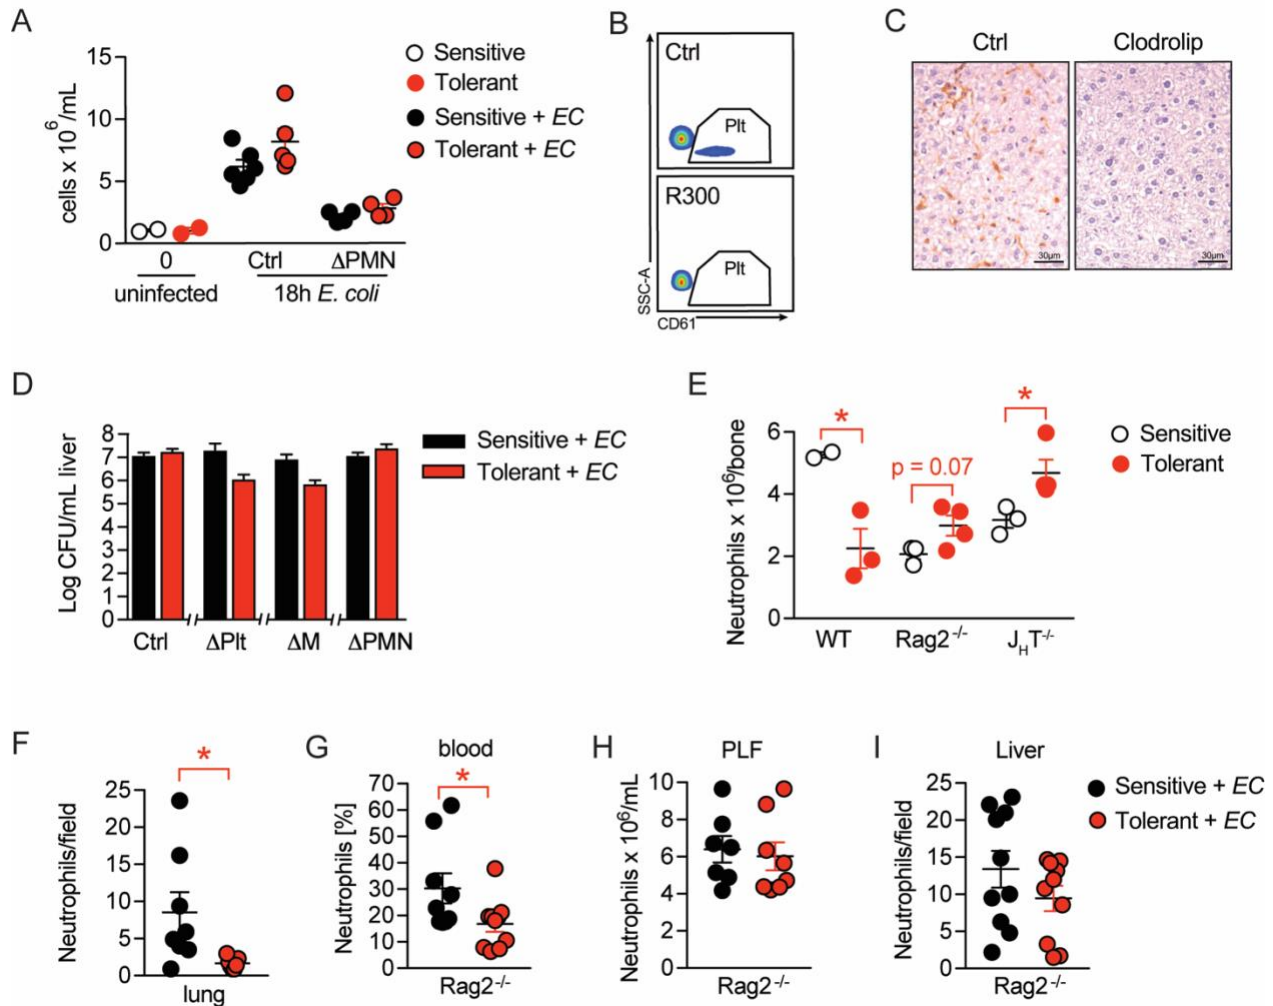

1

2 **Supplementary Figure 4:**

3 (A) PLF cell numbers of uninfected mice and mice 18h p.i. with *E. coli*, which received an anti-Ly-  
4 6G depletion antibody i.v. 24h before infection.

5 (B) Flow-cytometric analysis of blood platelets (SSC<sub>low</sub>, CD61<sup>+</sup>) in mice that received an anti-  
6 GPIb $\alpha$  (R300) depletion antibody 24h earlier.

7 (C) Immunohistological staining for F4/80<sup>+</sup> cells on liver sections of mice which received either  
8 clodronate-loaded liposomes (clodrolip) or empty control liposomes i.v. 24 hours earlier.

9 (D) *E. coli* CFUs 18h p.i. with *E. coli* in livers of NaCl or LPS pretreated mice, which received  
10 depletion antibodies for platelets or neutrophils, or clodronate liposomes before infection.

11 (E) Flow cytometric analysis of bone marrow neutrophil abundance 2 weeks after treatment with  
12 LPS or NaCl.

13 (F) Quantification of NIMP-R1<sup>+</sup> cells in immunohistological staining of lung sections from NaCl or  
14 LPS pretreated mice 18h p.i. with *E. coli*.

1 **(G-H)** Flow-cytometric analysis of neutrophils in blood and PLF of NaCl or LPS pretreated Rag2<sup>-/-</sup>  
2 mice 18h p.i. . with *E. coli*.  
3 **(I)** Quantification of NIMP-R1<sup>+</sup> cells after immunohistological staining of liver sections from NaCl  
4 or LPS pretreated Rag2<sup>-/-</sup> mice 18h p.i. with *E. coli*.  
5 Data shown in (A), (E) and (H) are representative out of 2 independent experiments (n = 2-6 per  
6 experimental group for A and E and n = 7-8 per experimental group for H). Data in (B-C) are from  
7 a single experiment, which was set up to test the depletion efficiency in uninfected animals (n = 3  
8 per experimental group). In (D) CFU data shown for the control group and neutrophil depletion are  
9 pooled from 2 independent experiments (n = 4-6 per experimental group) and data showing the  
10 platelet and monocyte/macrophage depletion are from a single experiment (n = 8 per group). Data  
11 depicted in (G) and (I) are pooled from 2 independent experiments (n = 4-6 per experimental  
12 group) and data in (F) are from a single experiment (n = 8 per group). All data are presented as  
13 mean +/- SEM. \* p ≤ 0.05.

Supp. Figure 5

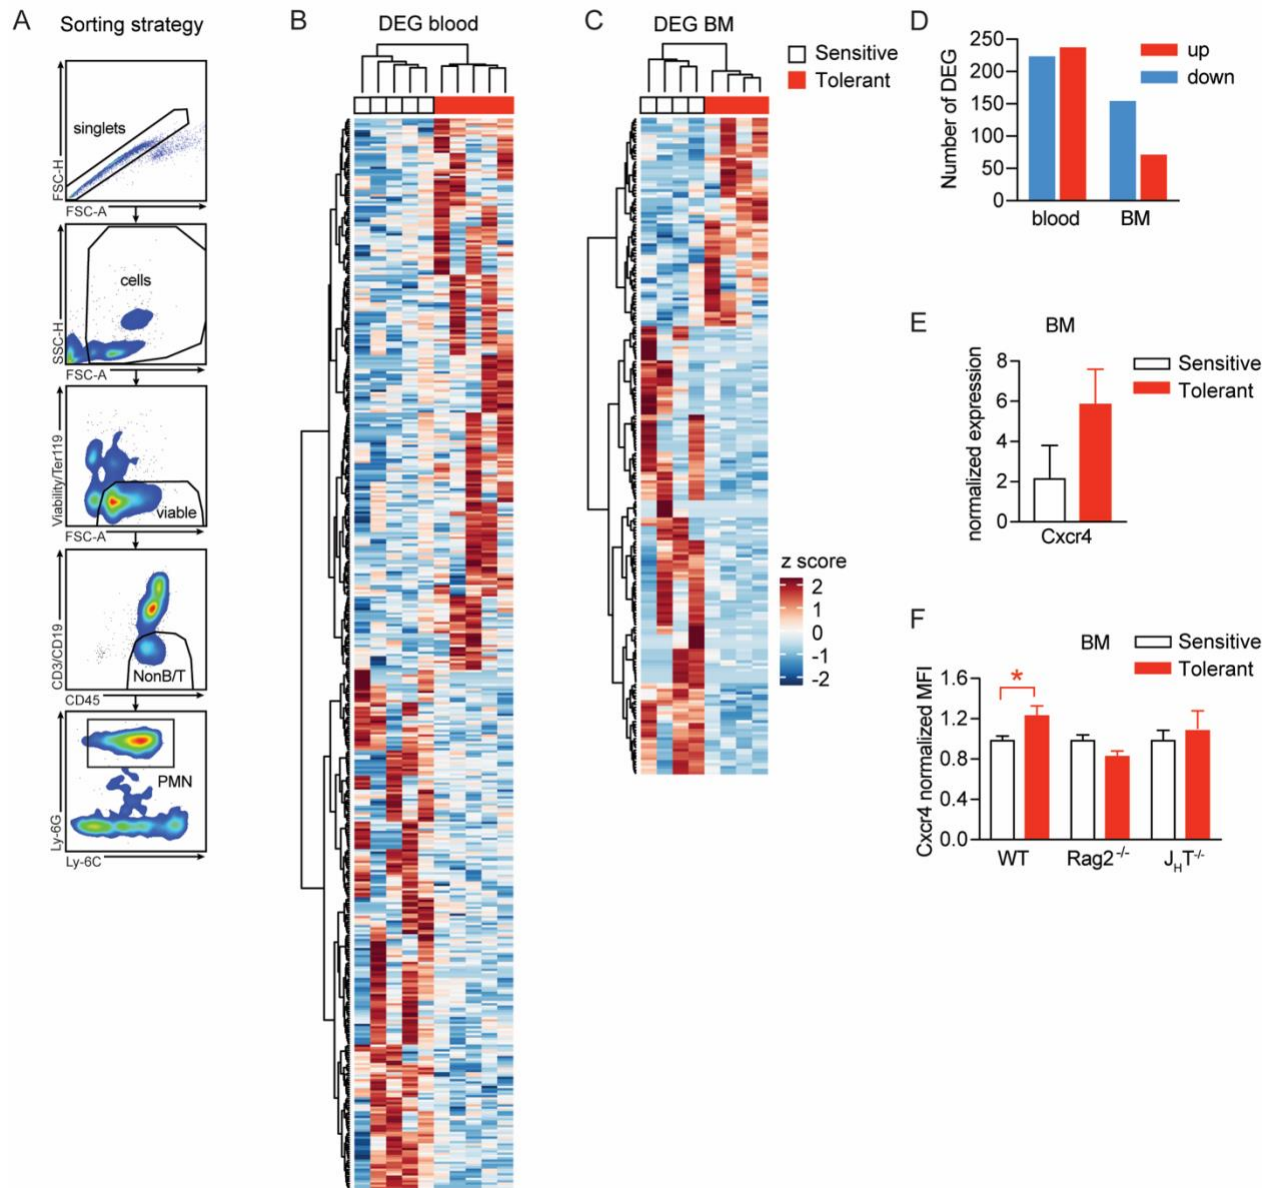

- 1  
2 **Supplementary Figure 5:**  
3 **(A)** Gating strategy applied for neutrophil sorting from blood and bone marrow.  
4 **(B-C)** Hierarchical clustering of DEG of blood and bone marrow neutrophils from mice that were  
5 pretreated with LPS versus NaCl 2 weeks earlier.  
6 **(D)** Number of up- and downregulated DEG in blood and bone marrow neutrophils from mice  
7 pretreated with LPS 2 weeks earlier, as compared to NaCl treated controls.  
8 **(E)** Normalized gene expression of *Cxcr4* in sorted bone marrow neutrophils.  
9 **(F)** Normalized MFI of *Cxcr4* on bone marrow neutrophils assessed by flow cytometry in indicated  
10 mouse strains.

Gawish *et al.* 2022

- 1 Data in (A-E) are from a single experiment (n = 4-5/group) and data in (F) are from a different
- 2 single experiment (n = 3-4/group). All data are presented as mean +/- SEM. \*  $p \leq 0.05$ .

## 1 **Abbreviations**

|    |                |                                     |
|----|----------------|-------------------------------------|
| 2  | ALAT           | Alanine aminotransferase            |
| 3  | ASAT           | Apartate aminotransferase           |
| 4  | Cxcr4          | CXC-motive chemokine receptor 4     |
| 5  | DEG            | differentially expressed gene       |
| 6  | <i>E. coli</i> | <i>Escherichia coli</i>             |
| 7  | FO B cell      | follicular B cell                   |
| 8  | IFNAR          | interferon- $\alpha/\beta$ receptor |
| 9  | <i>i.p.</i>    | intraperitoneally                   |
| 10 | IRA B cell     | innate response activator B cell    |
| 11 | <i>i.v.</i>    | intravenously                       |
| 12 | LPS            | Lipopolysaccharide                  |
| 13 | MZ B cell      | marginal zone B cell                |
| 14 | PLF            | peritoneal lavage fluid             |
| 15 | <i>p.i.</i>    | post infection                      |
| 16 | TLR            | Toll-like receptor                  |
